# Supplementary material for: Design, synthesis, anticancer activity and molecular docking studies of new benzimidazole derivatives bearing 1,3,4-oxadiazole moieties as potential thymidylate synthase inhibitors
Source: Royal Society of Chemistry journal article supplement (doi:10.1039/d2nj01980a), 2022-01-01

## NEW JOURNAL OF CHEMISTRY

### SUPPLEMENTARY MATERIAL

#### **Design, synthesis, anticancer activity and molecular docking studies of new benzimidazole derivatives bearing 1,3,4-oxadiazole moiety as potential thymidylate synthase inhibitors**

Abdulraheem SA Almalki<sup>a</sup>, Syed Nazreen<sup>\* , b</sup>, Serag Eldin I. Elbehairi<sup>c,d</sup>, Mohammad Asad<sup>e,f</sup>, Ali A Shati<sup>c</sup>, Mohammad Y. Alfaifi<sup>c</sup>, Abdulrahman Alhadhrami<sup>a</sup>, Ahmed A. Elhenawy<sup>b,g</sup>, Ali Q. Alorabi<sup>b</sup>, Abdullah M. Asiri<sup>e,f</sup>, Mohammad Mahboob Alam<sup>\* , b</sup>

# <sup>1</sup>H NMR of compound 7

Mahboob  
Sample 12 CDCL<sub>3</sub>

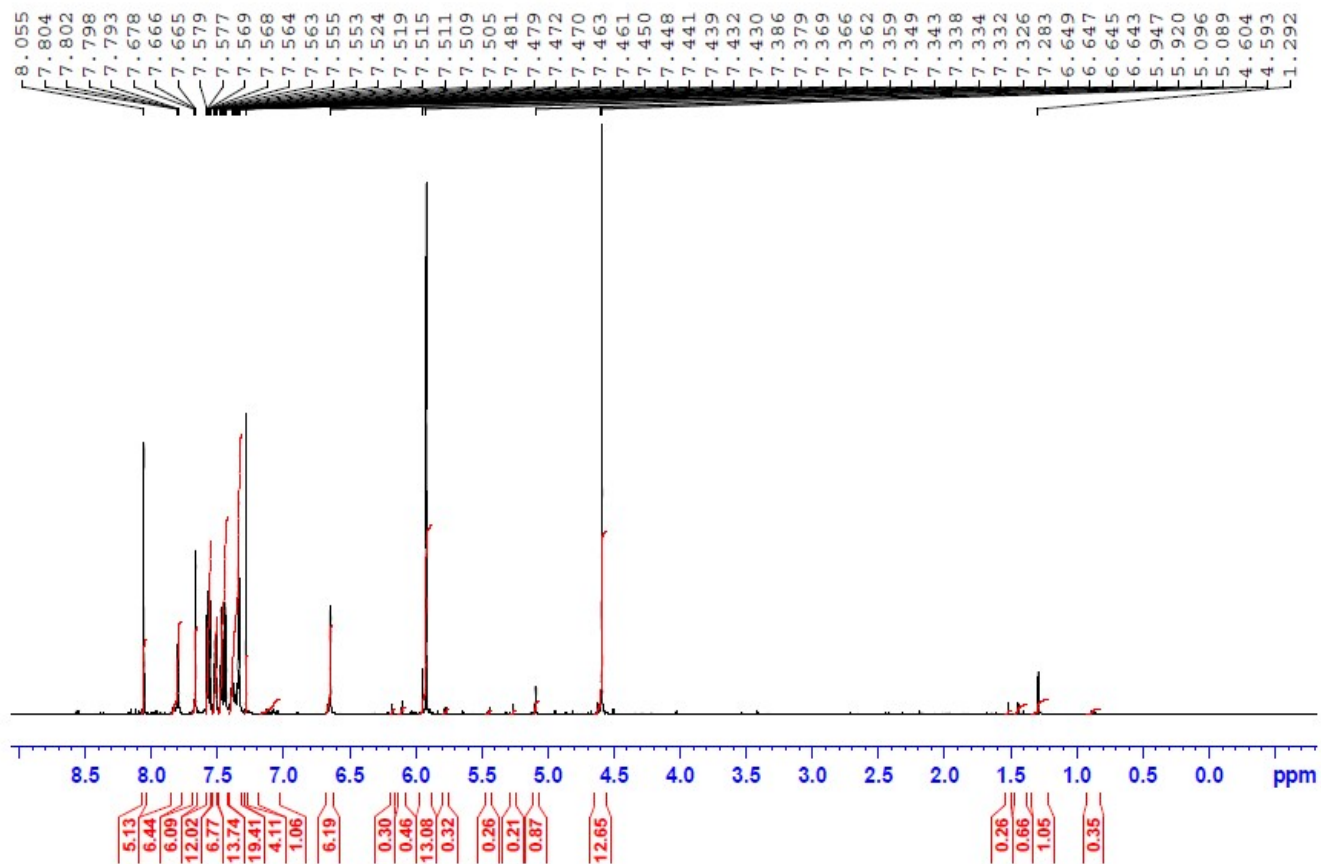

# <sup>1</sup>H NMR of compound 8

Mahboob  
Sample 14 CDCL<sub>3</sub>

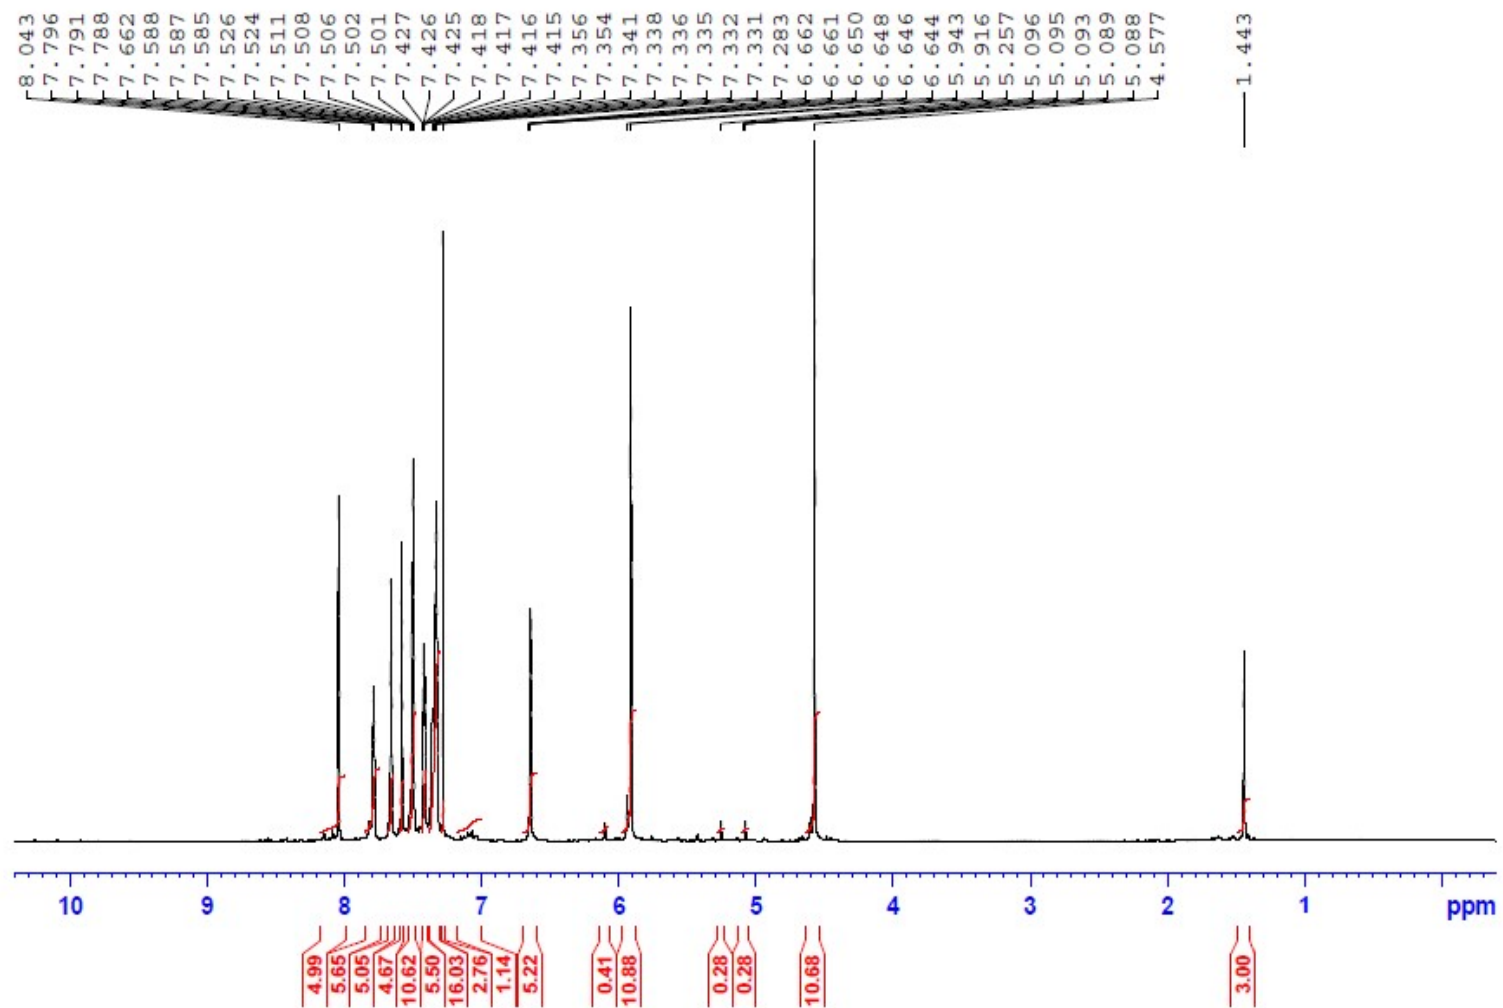

# <sup>1</sup>H NMR of compound 9

Mahboob  
Sample 10 CDCL<sub>3</sub>

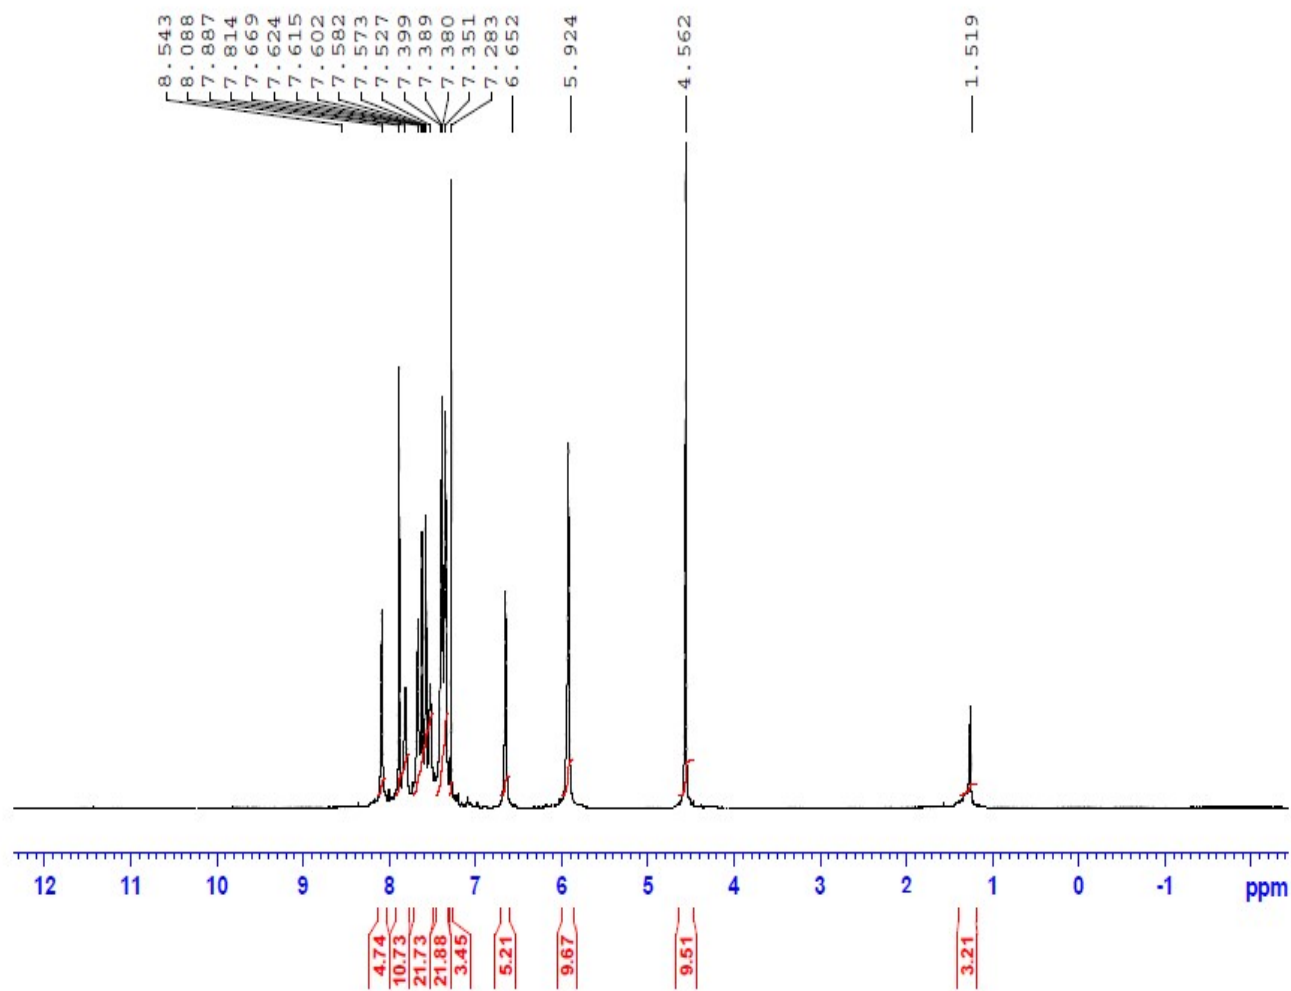

# <sup>1</sup>H NMR of compound 10

Mahboob  
Sample 11 CDCL<sub>3</sub>

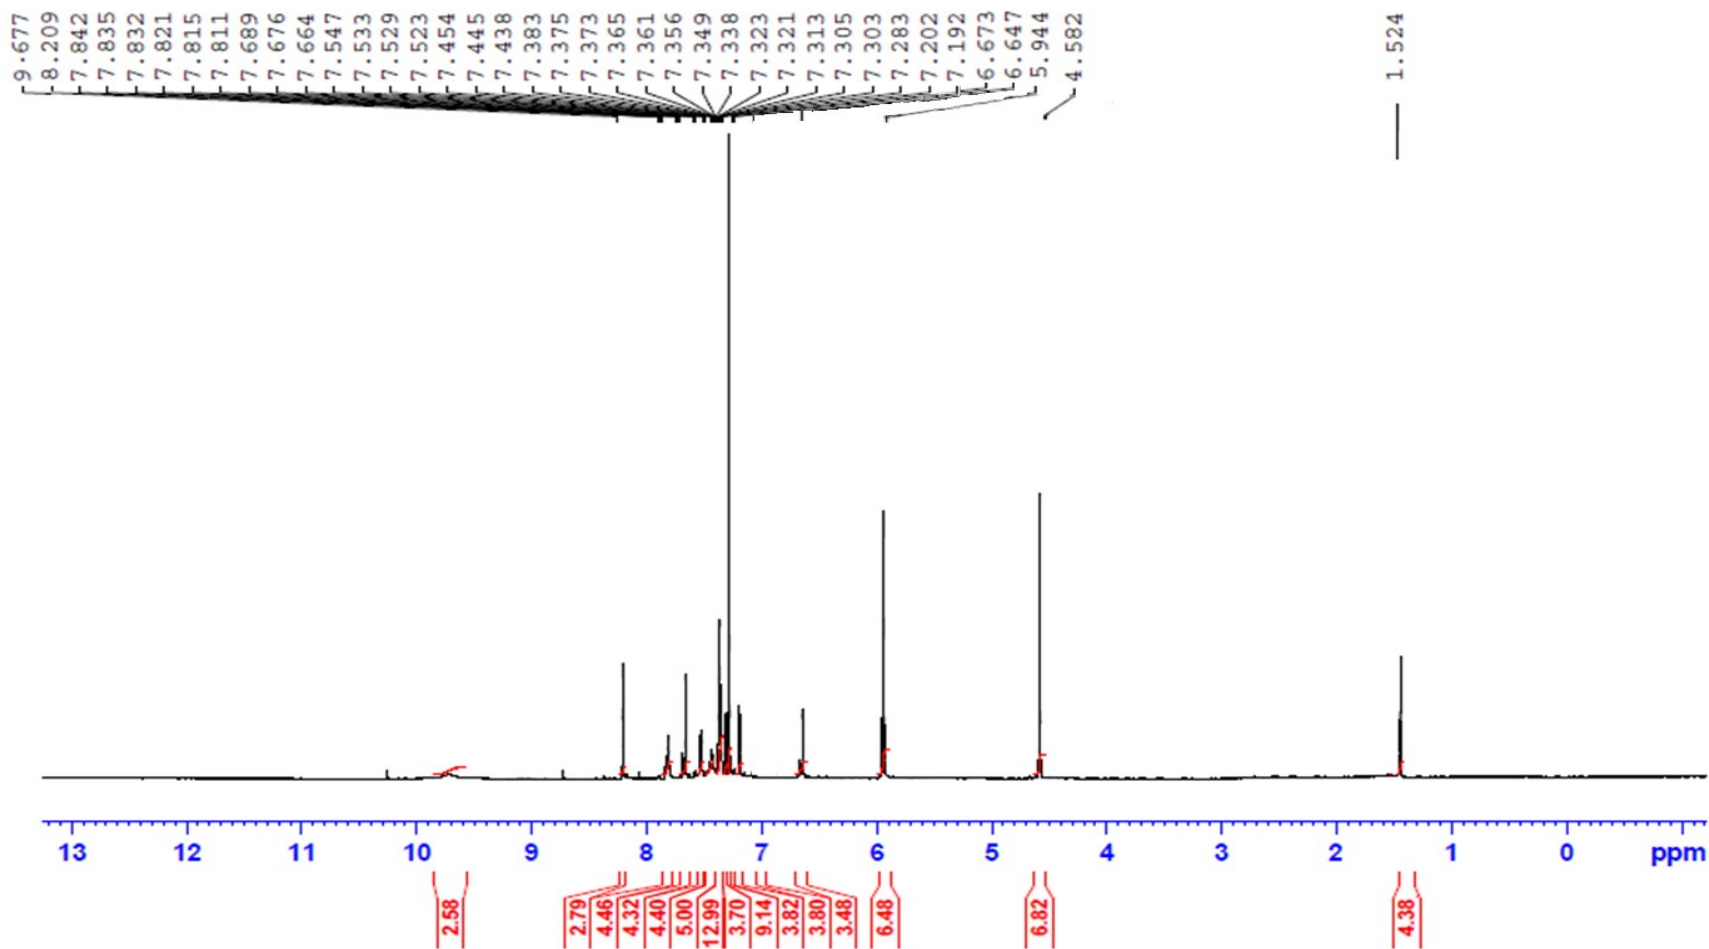

# <sup>1</sup>H NMR of compound 11

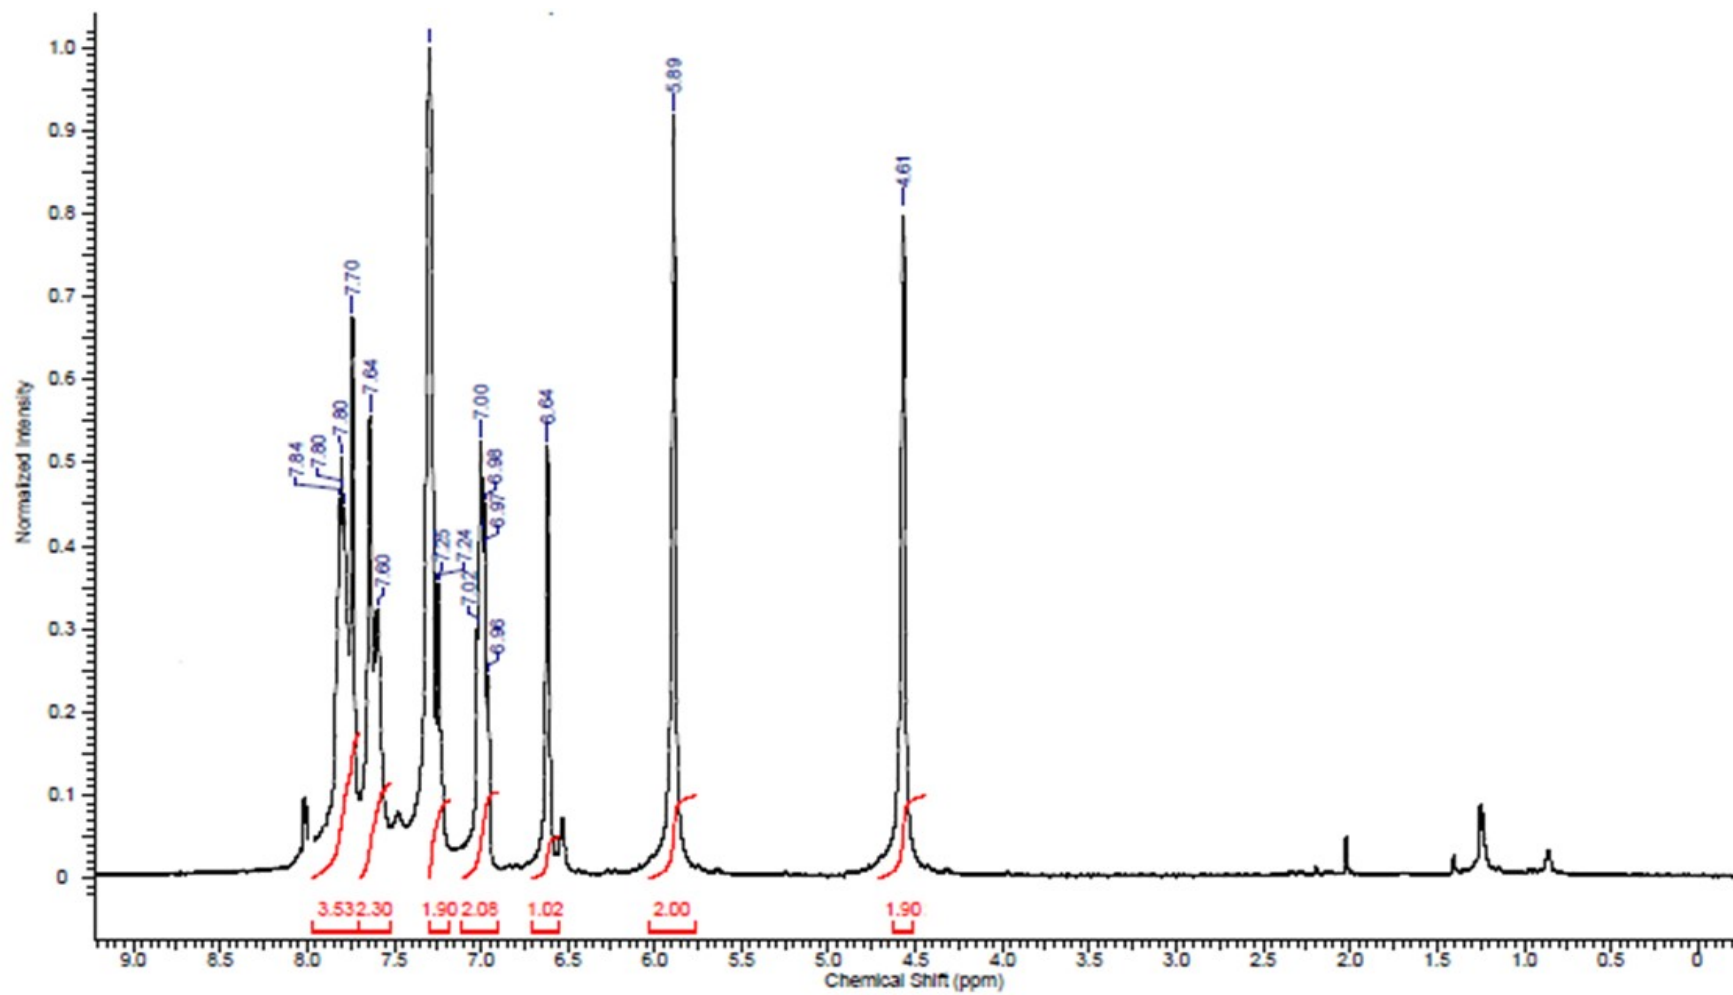

# <sup>1</sup>H NMR of compound 12

Mahboob  
Sample 13 CDCL<sub>3</sub>

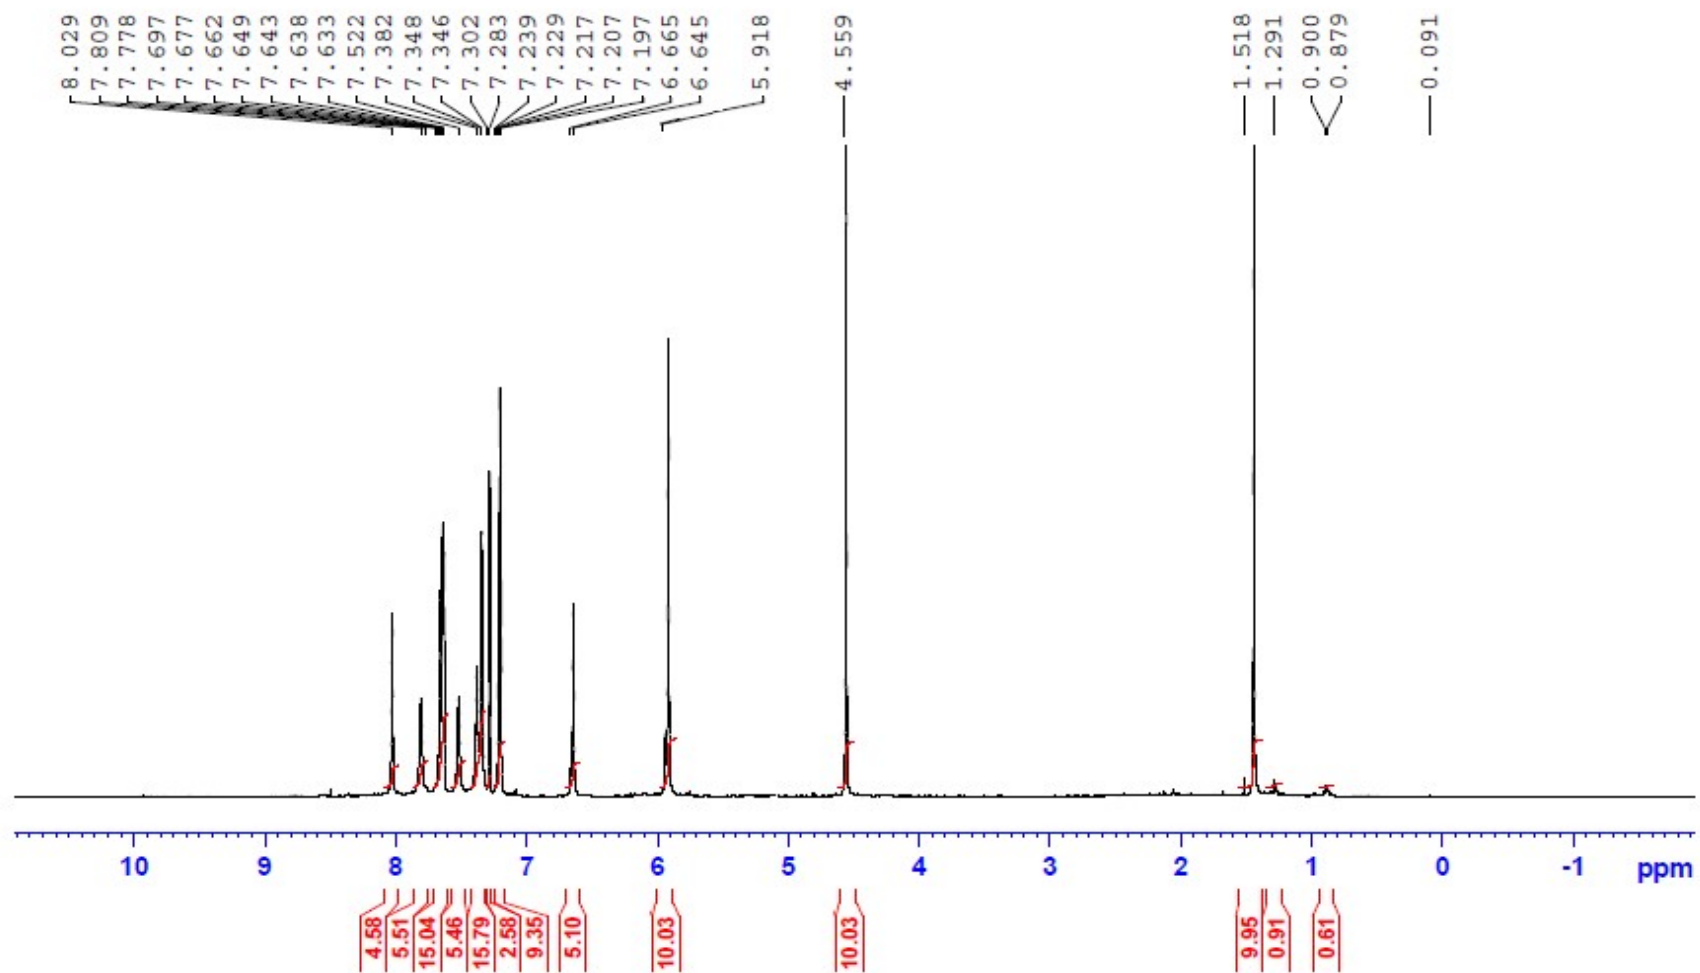

# <sup>1</sup>H NMR of compound 13

Mahboob  
Sample 21 CDCL<sub>3</sub>

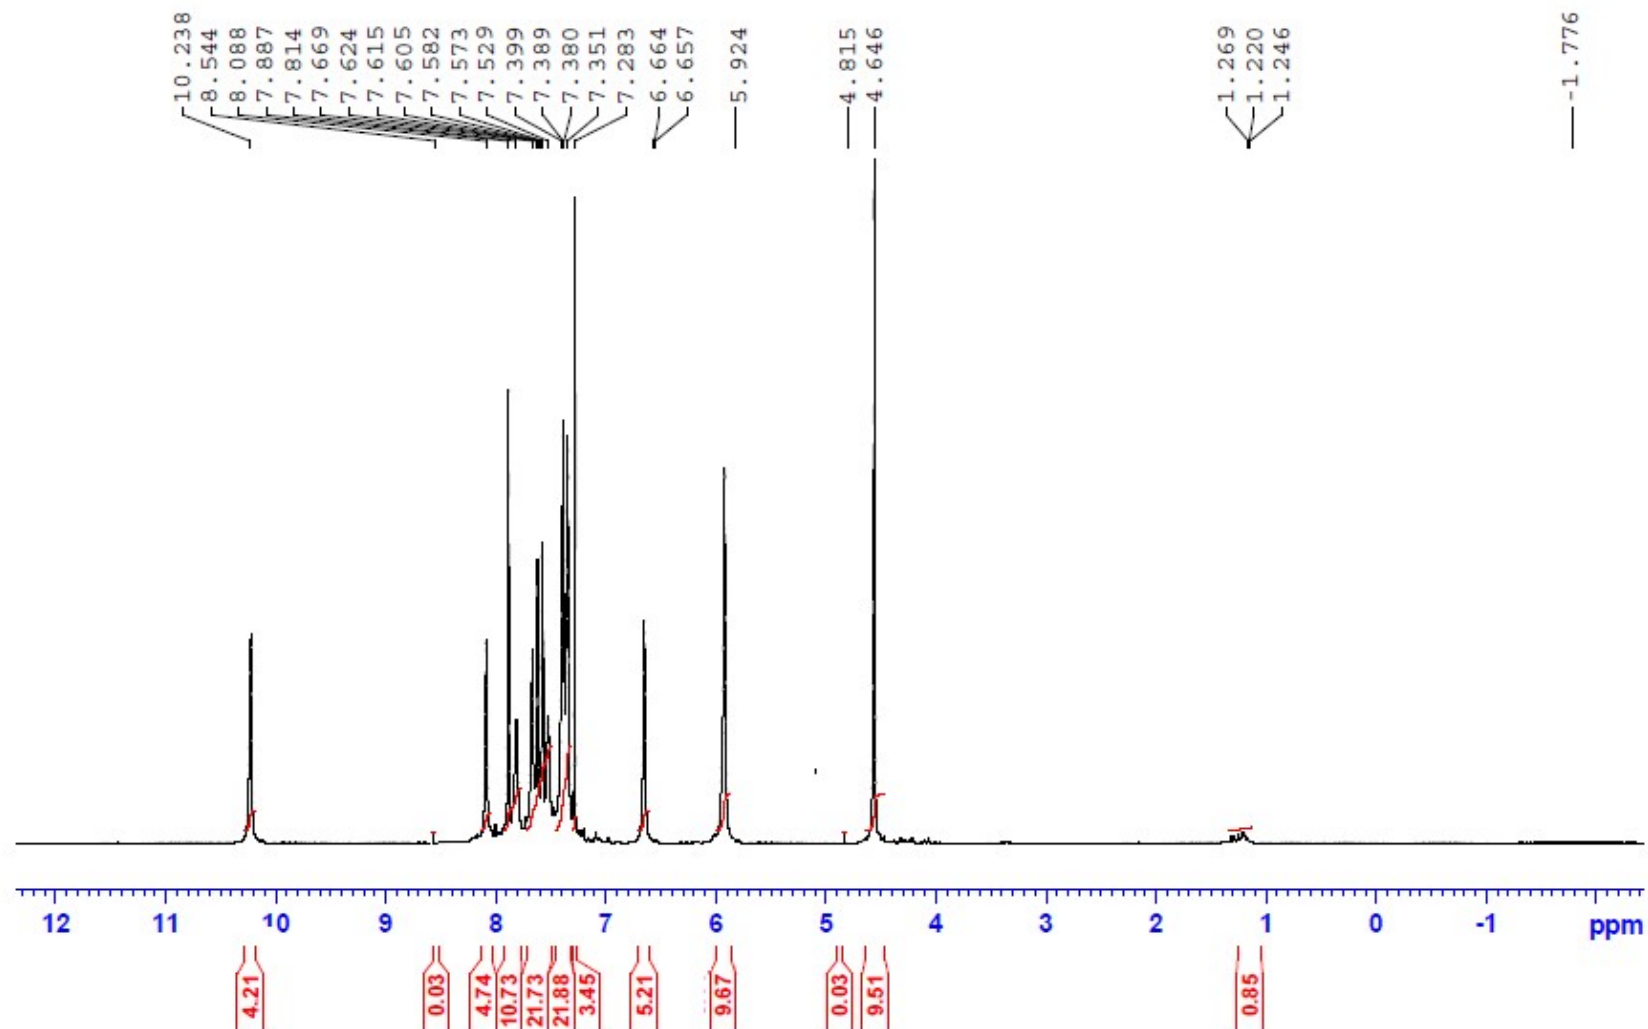



# <sup>1</sup>H NMR of compound 14

Mahboob  
Sample 25 CDCL<sub>3</sub>

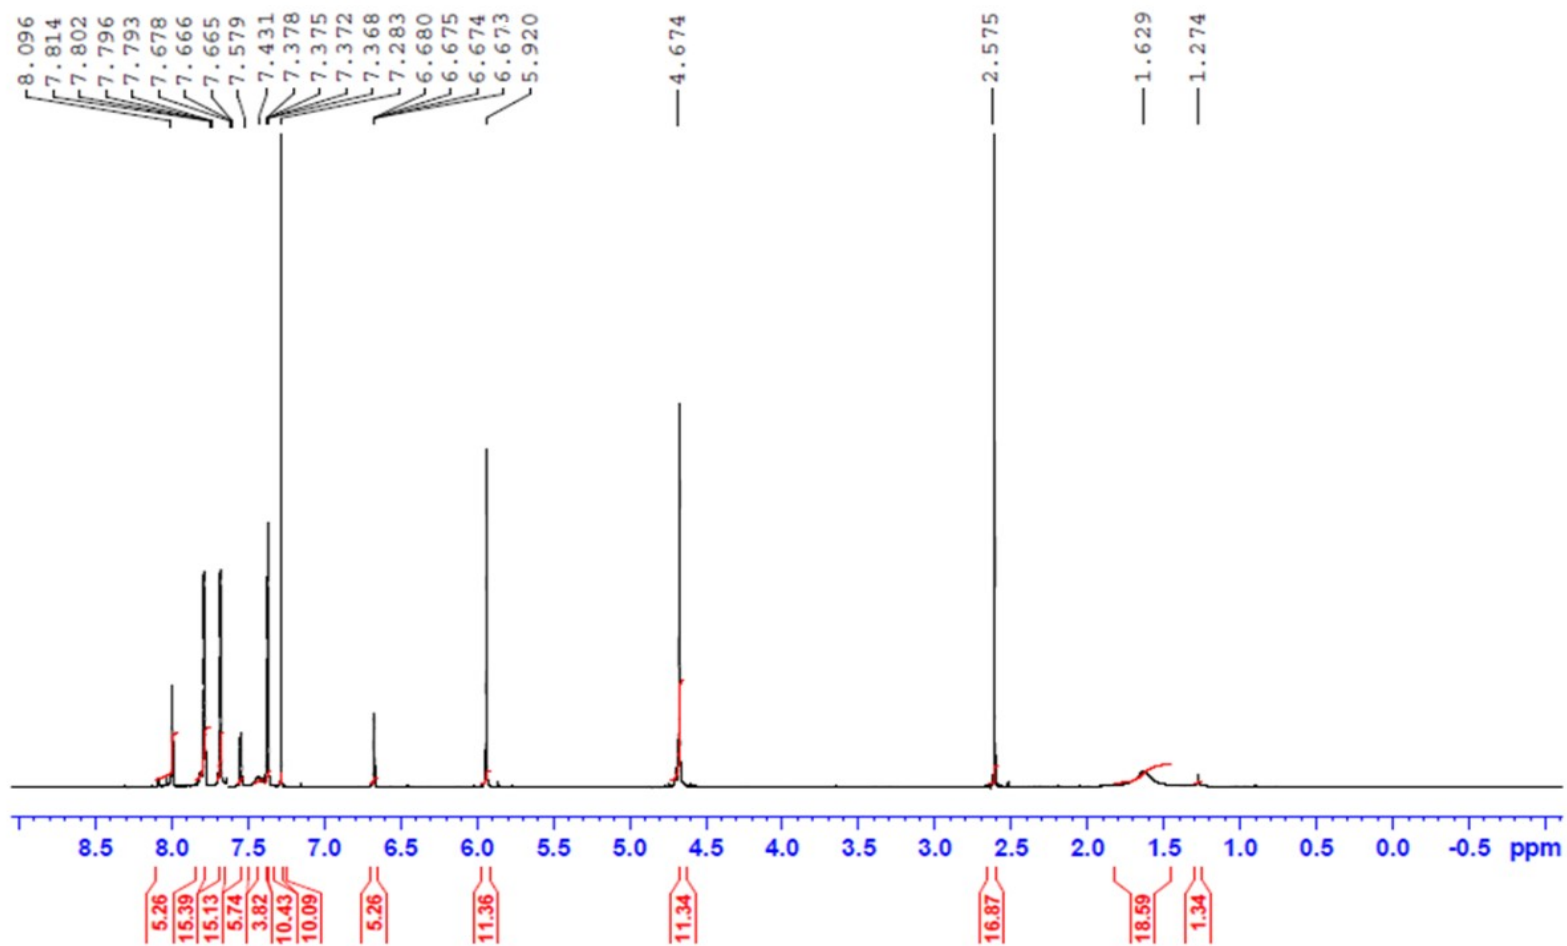

# <sup>1</sup>H NMR of compound 15

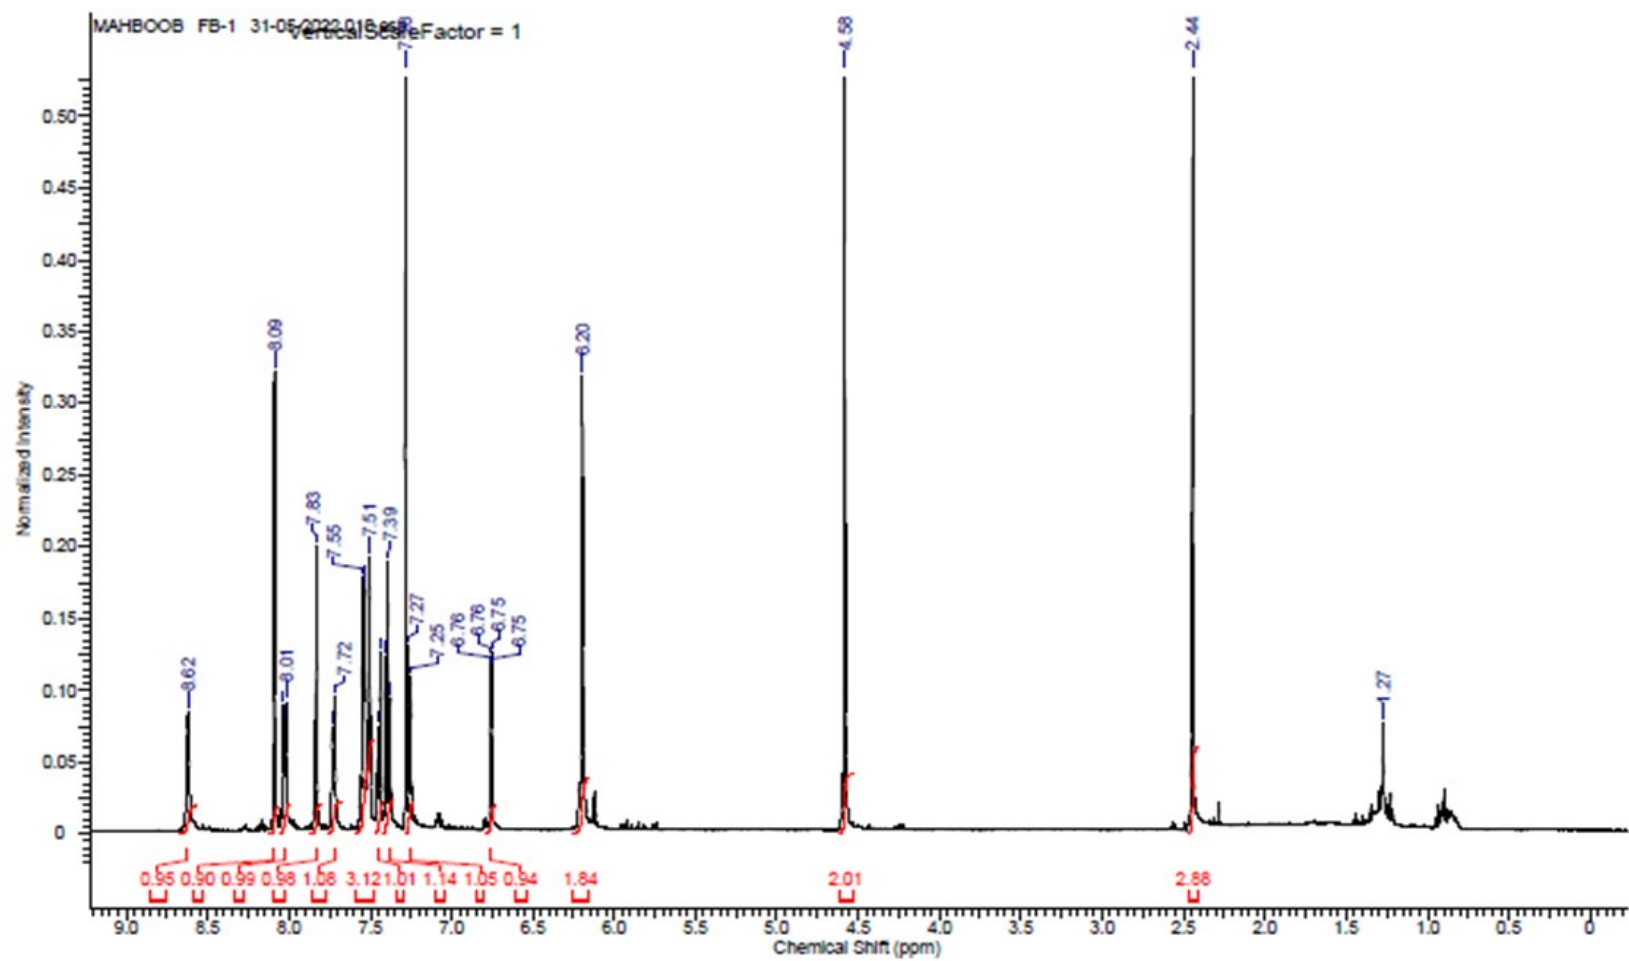

# <sup>1</sup>H NMR of compound 16

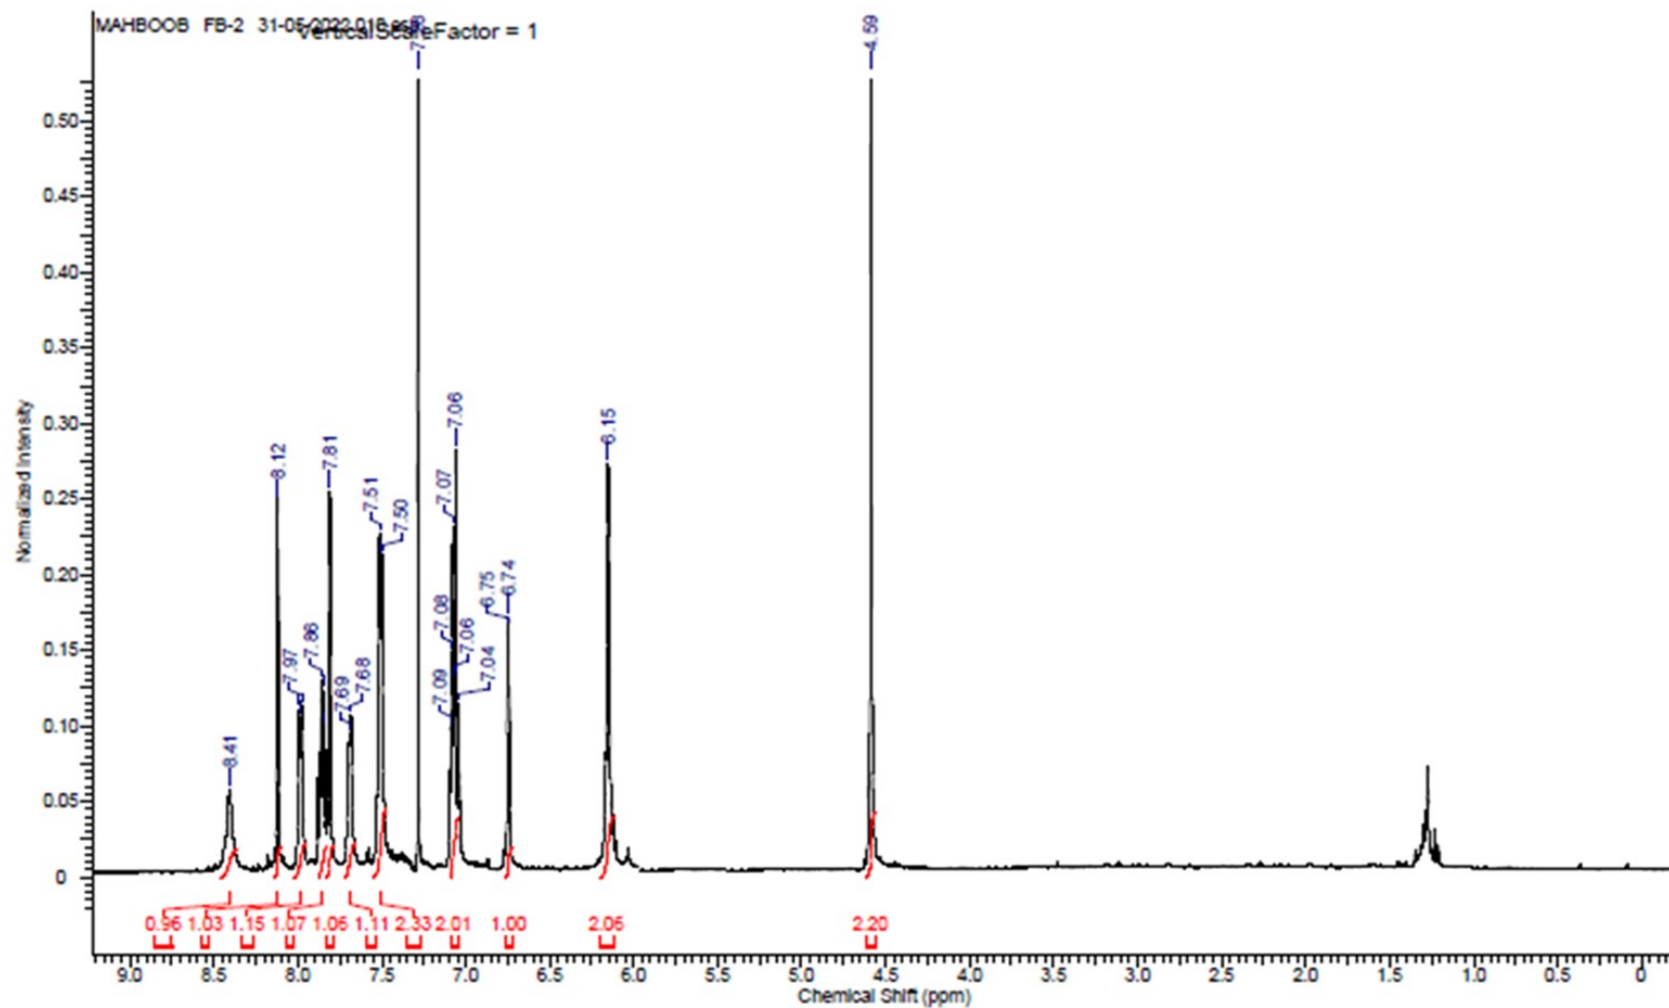

# <sup>1</sup>H NMR of compound 17

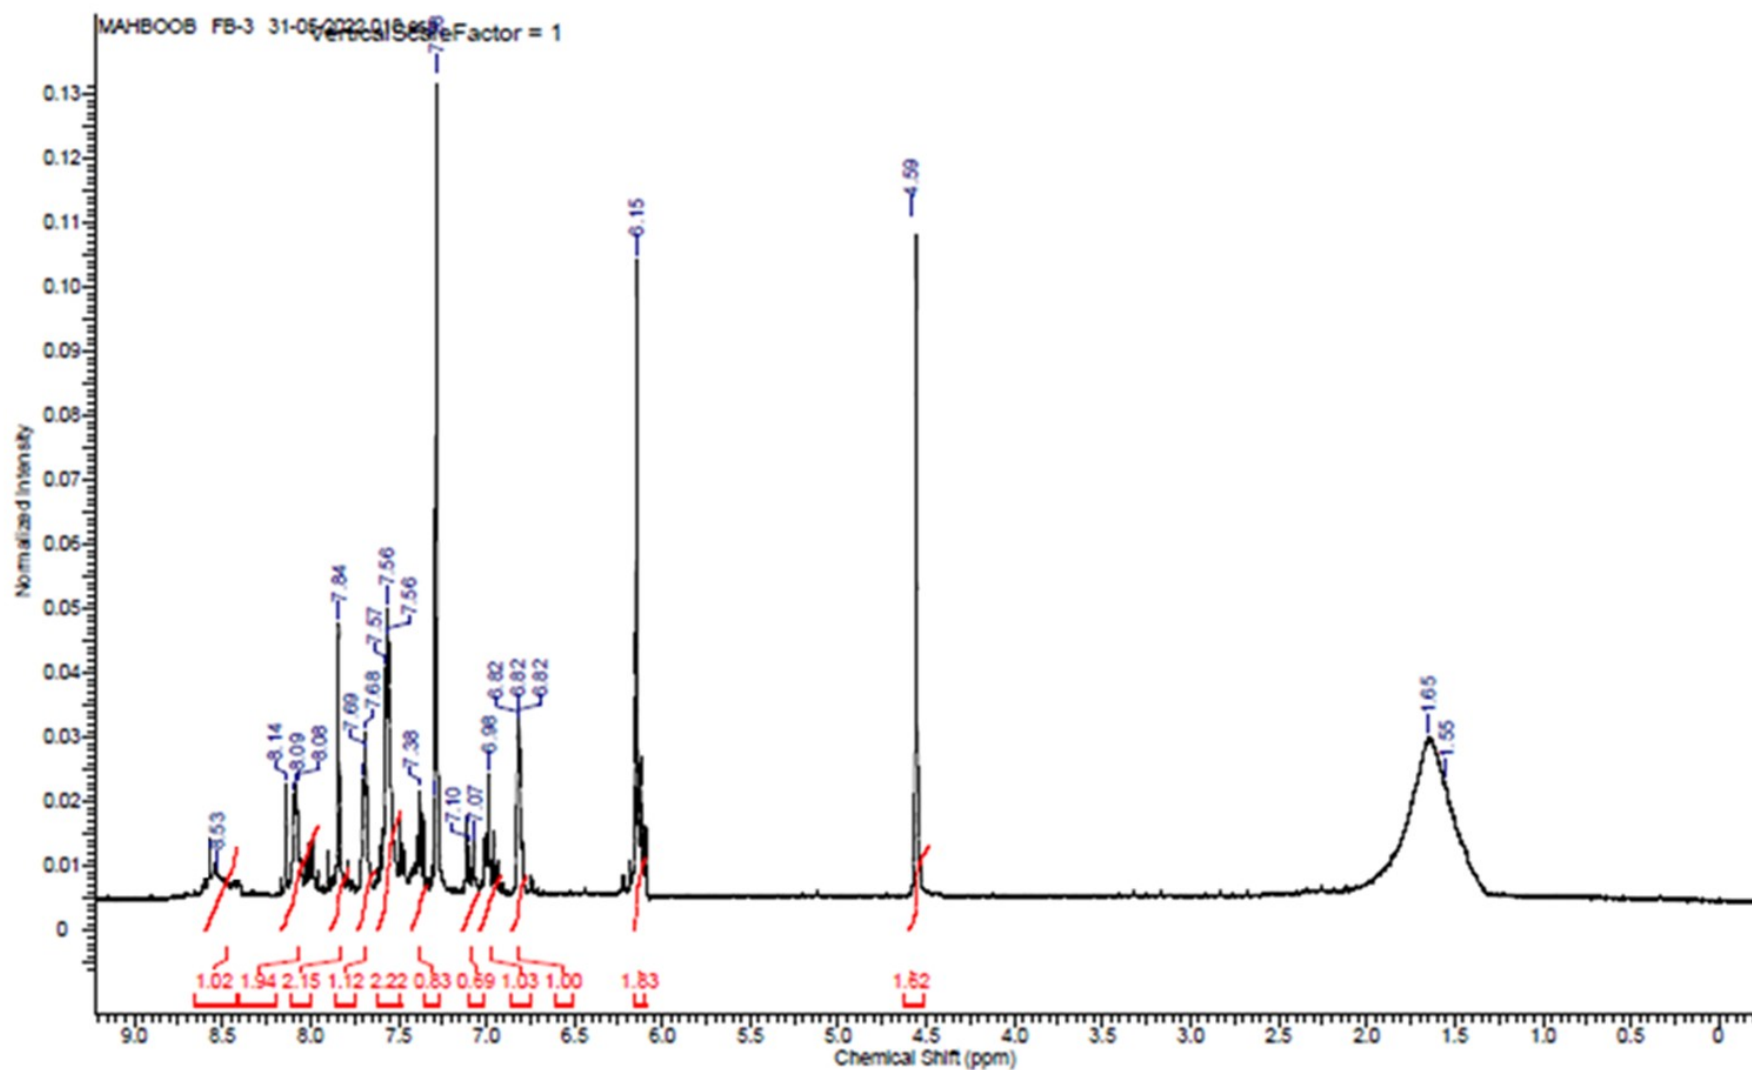

# <sup>1</sup>H NMR of compound 18

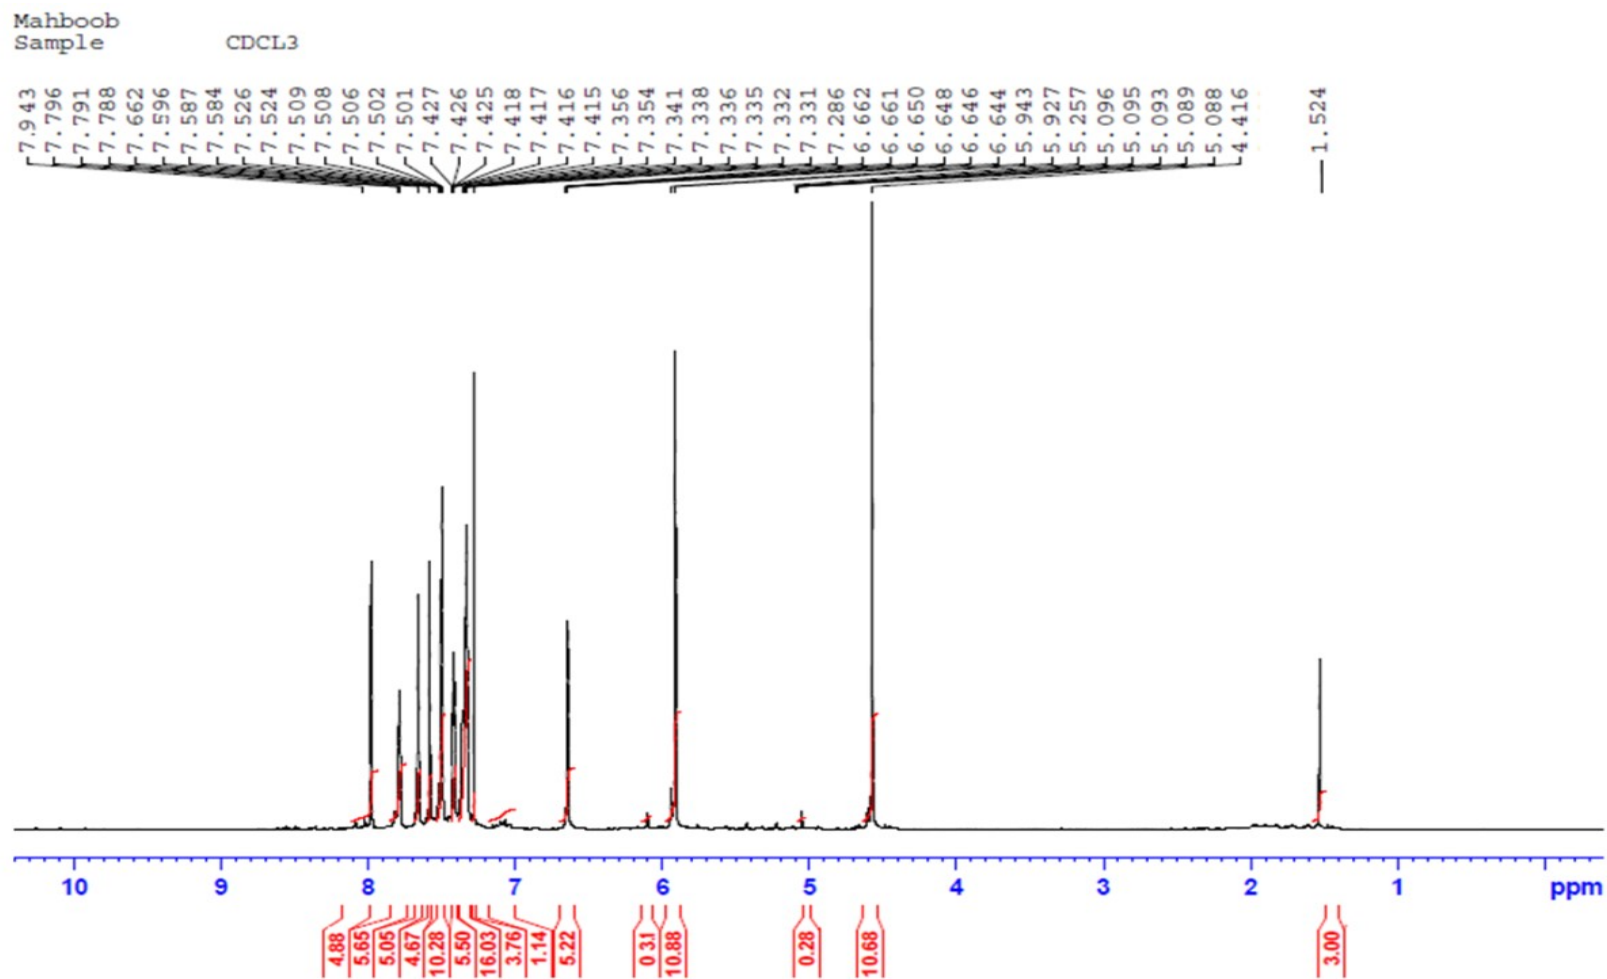

# <sup>1</sup>H NMR of compound 19

Mahboob  
Sample 15 CDCL<sub>3</sub>

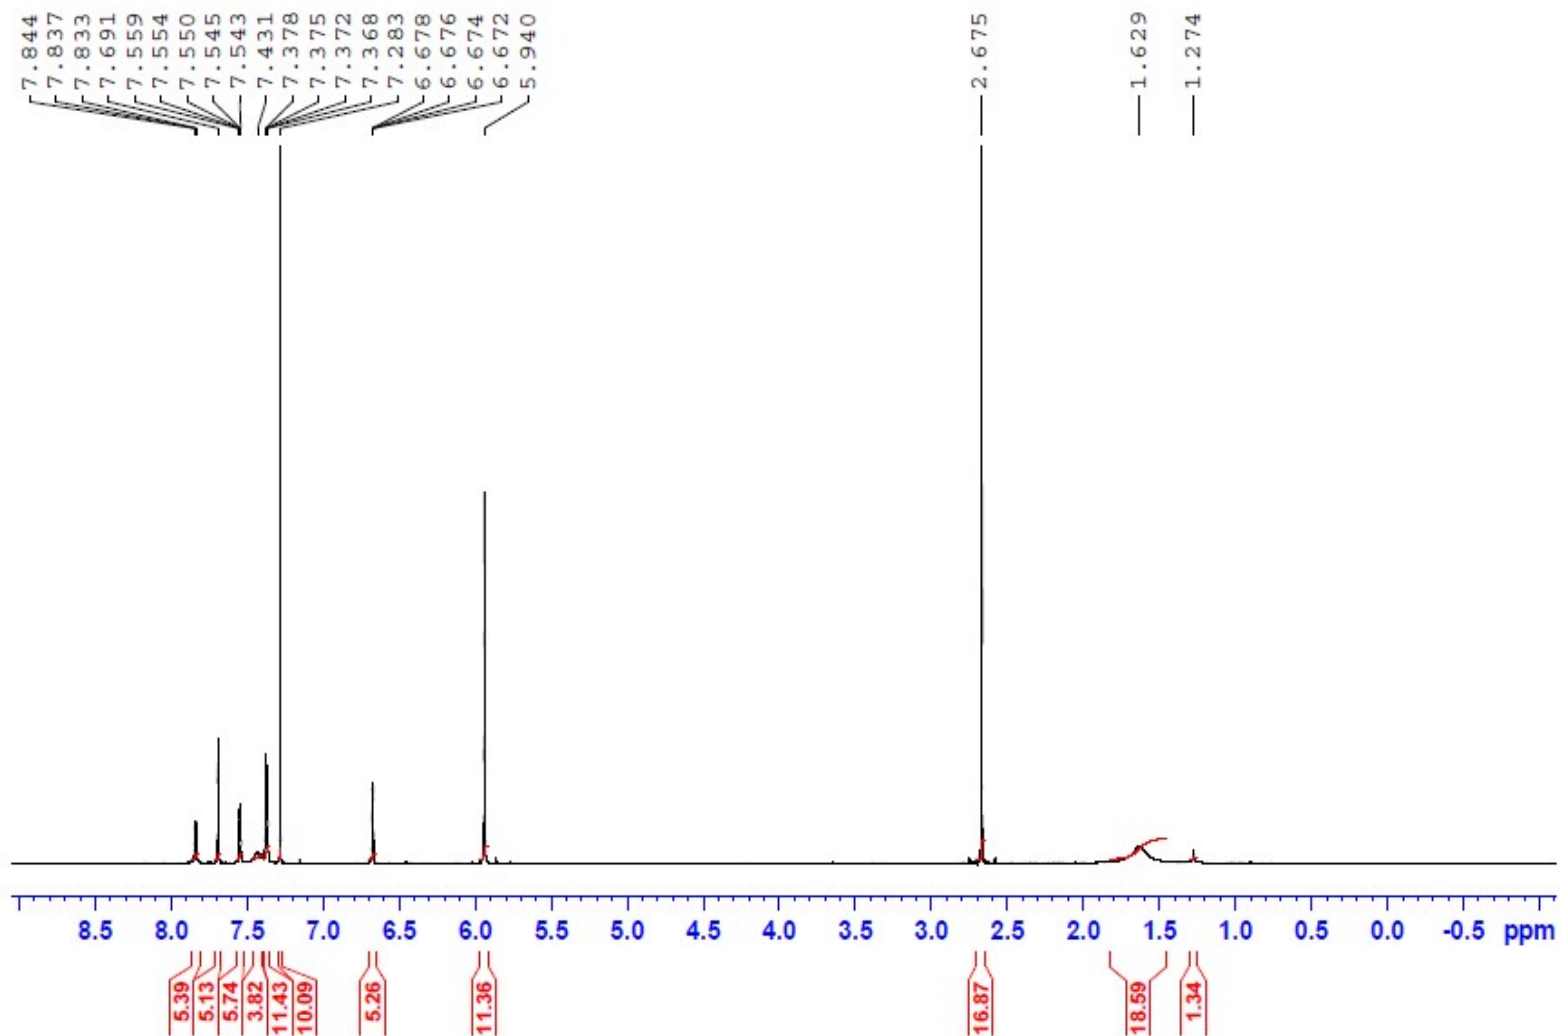

# <sup>1</sup>H NMR of compound 20

Mahboob  
Sample 16 DMSO

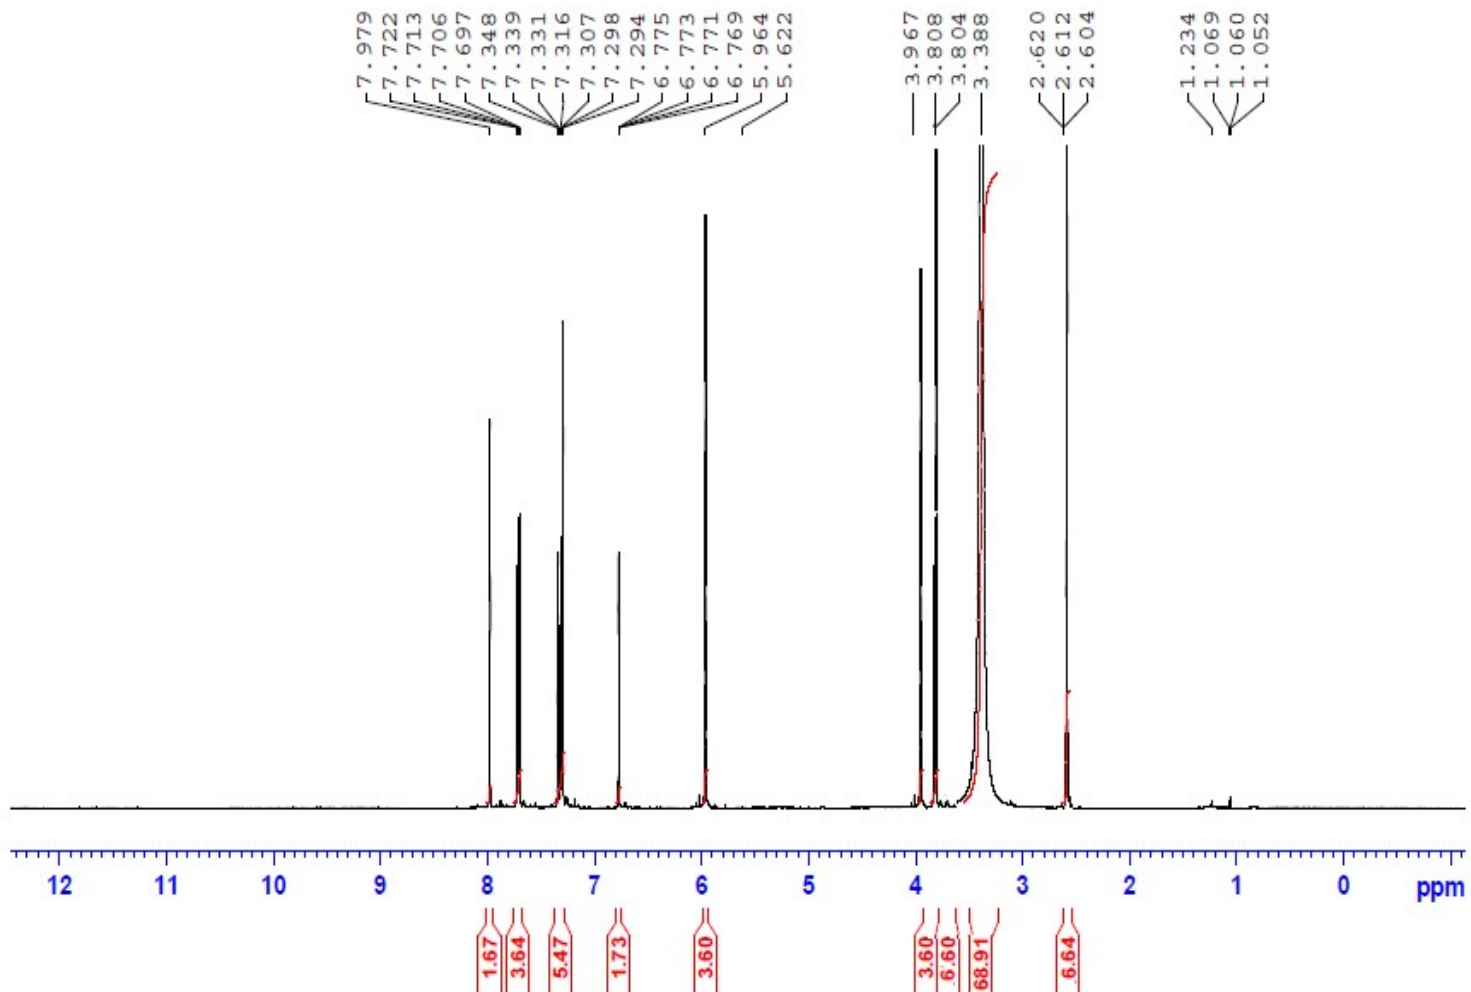

# <sup>13</sup>C NMR of compound 7

Mahboob  
Sample 12 CDCL<sub>3</sub>

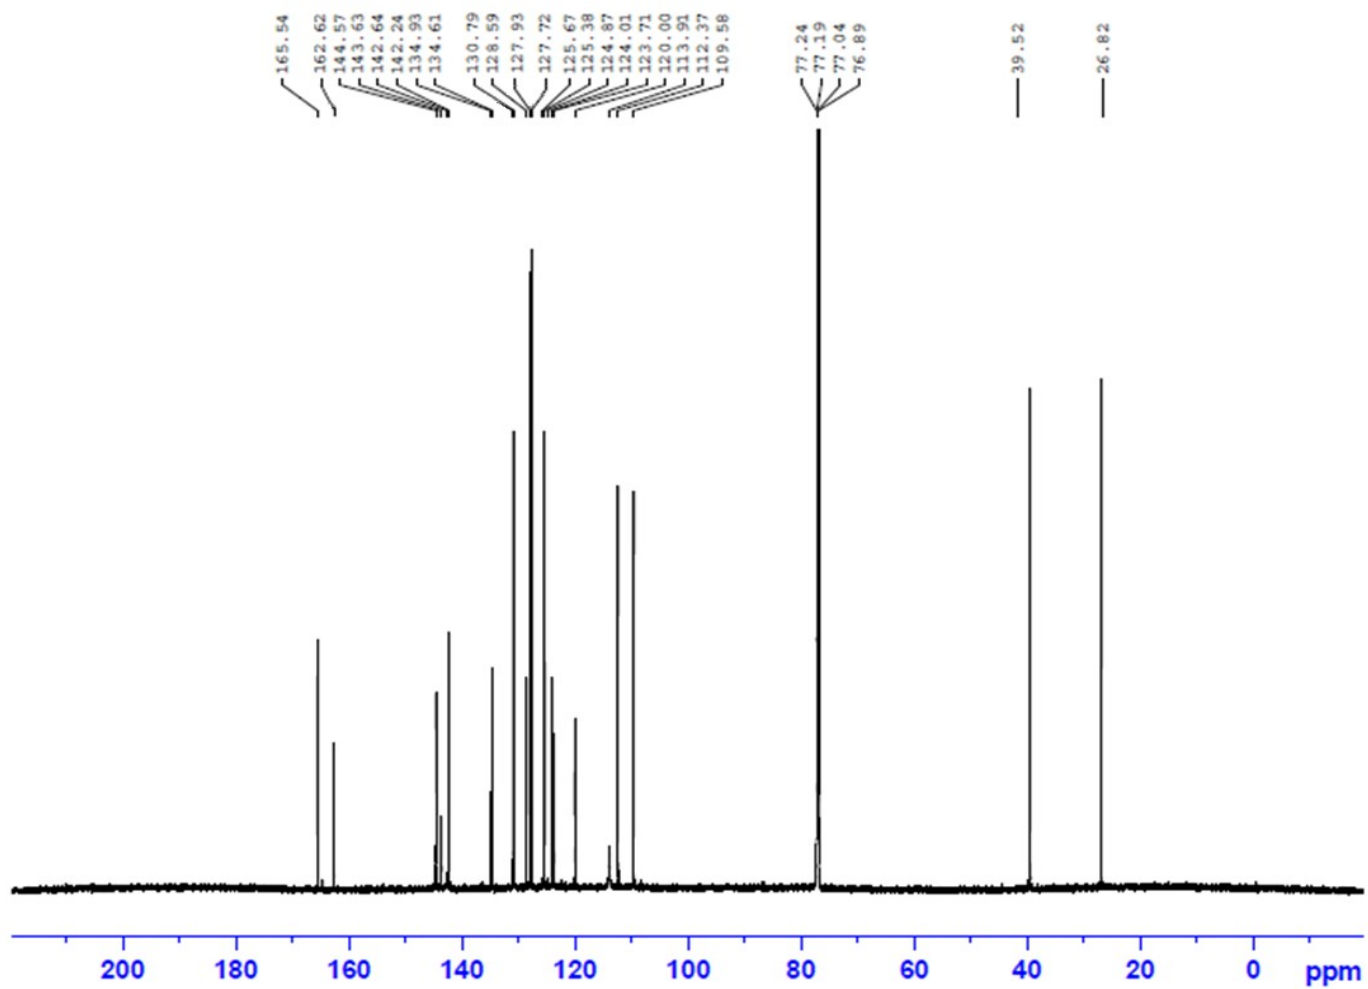



# <sup>13</sup>C NMR of compound 8

Mahboob  
Sample 14 CDCL<sub>3</sub>

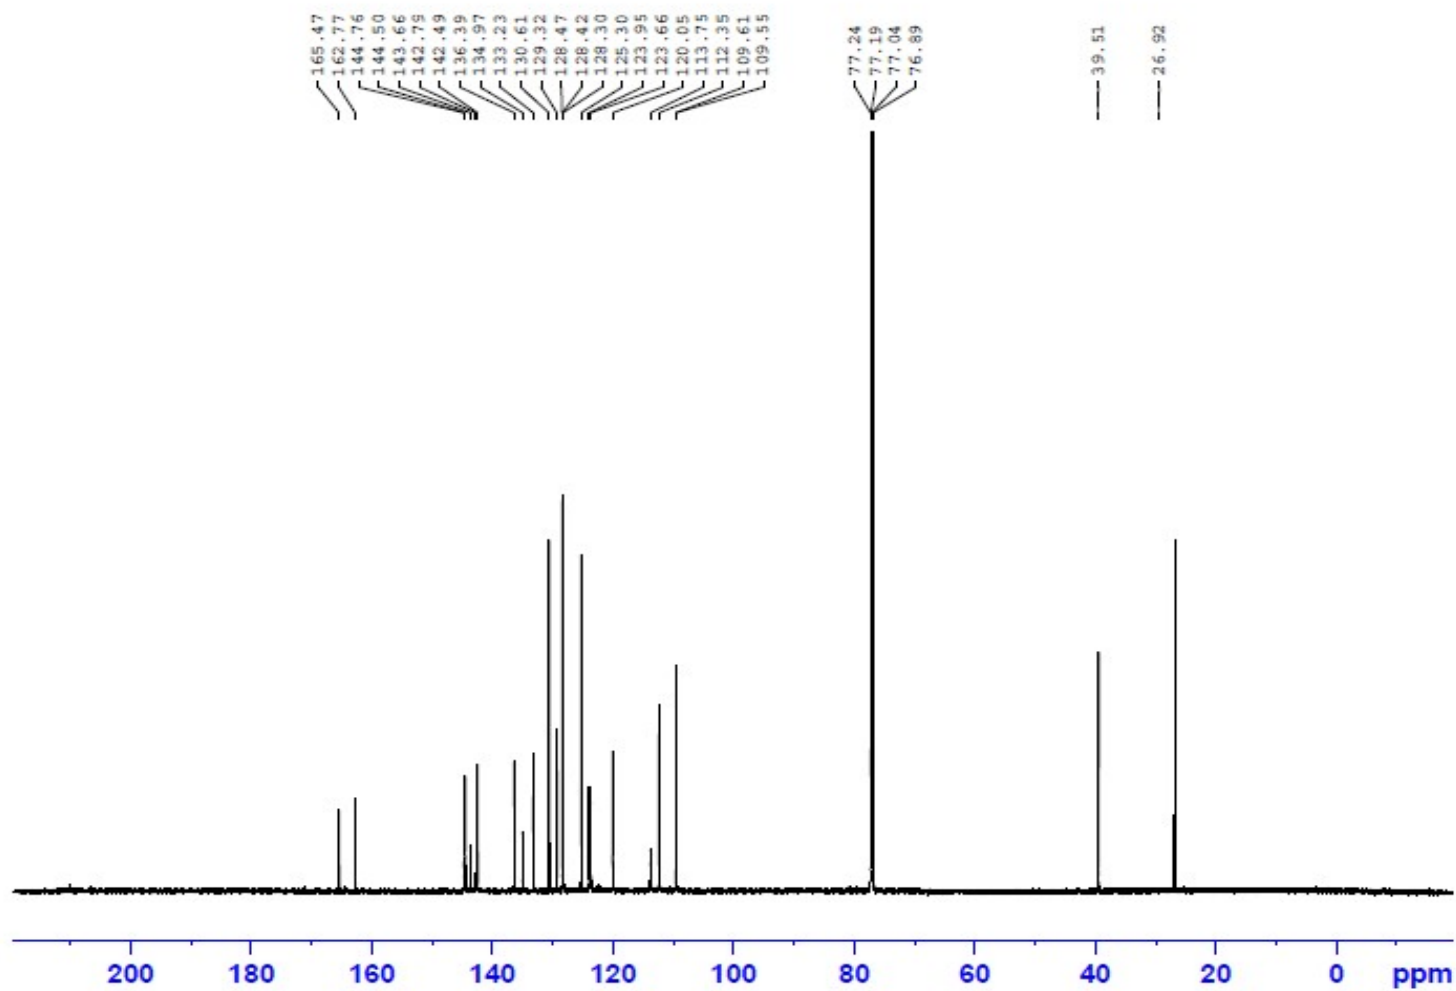

# <sup>13</sup>C NMR of compound 9

Mahboob  
Sample 10 CDCL<sub>3</sub>

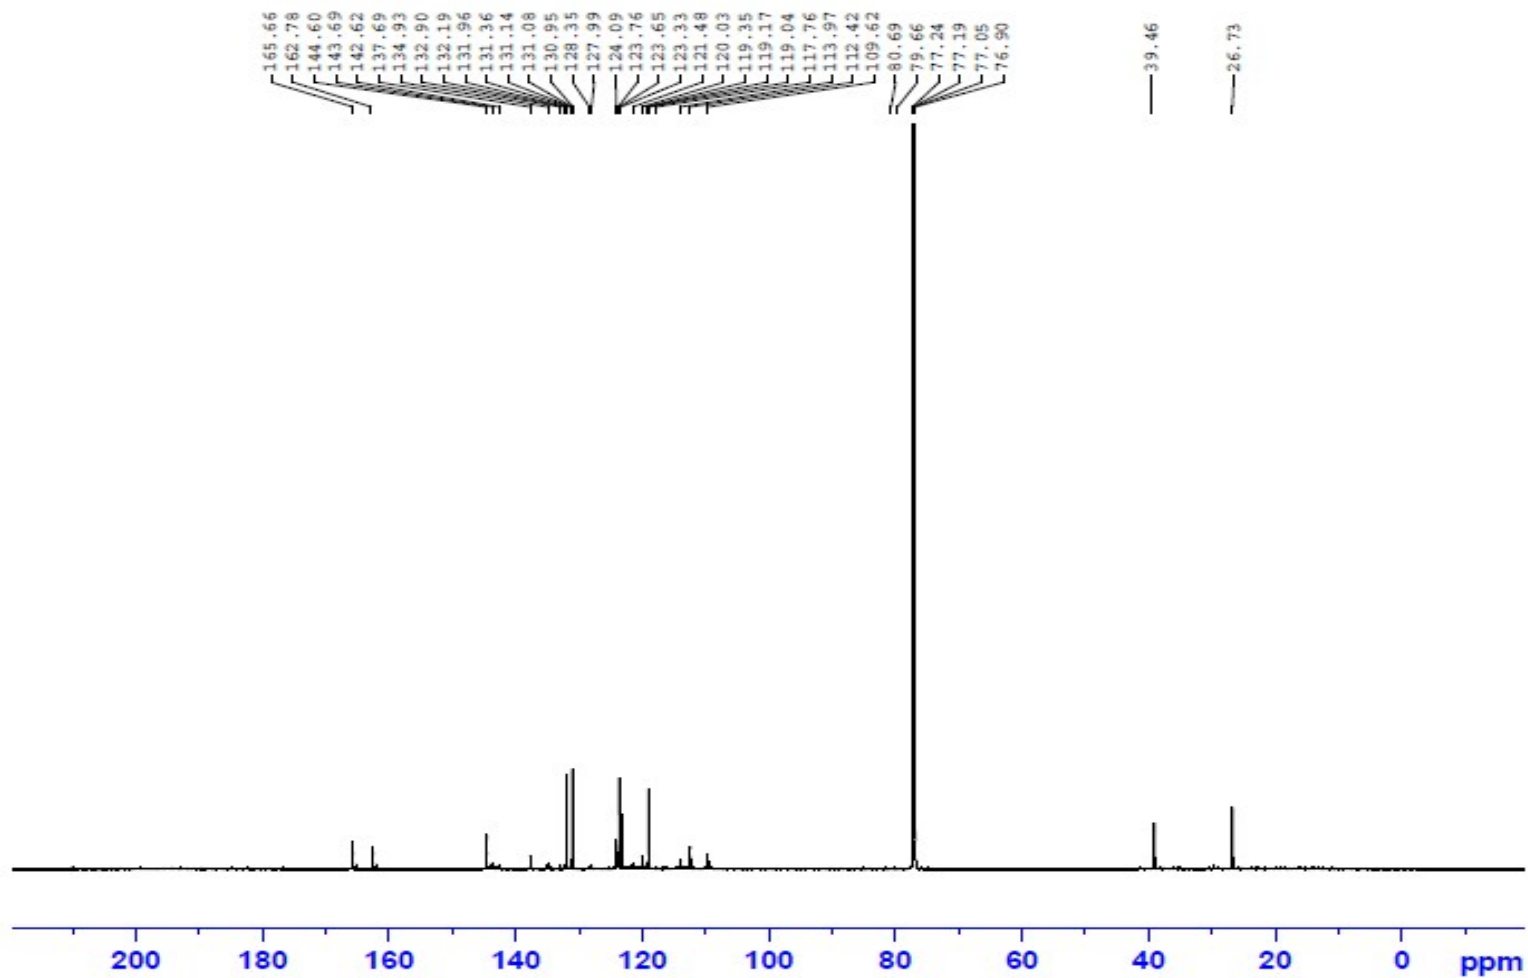

# <sup>13</sup>C NMR of compound 10

Mahboob  
Sample 11 CDCL<sub>3</sub>

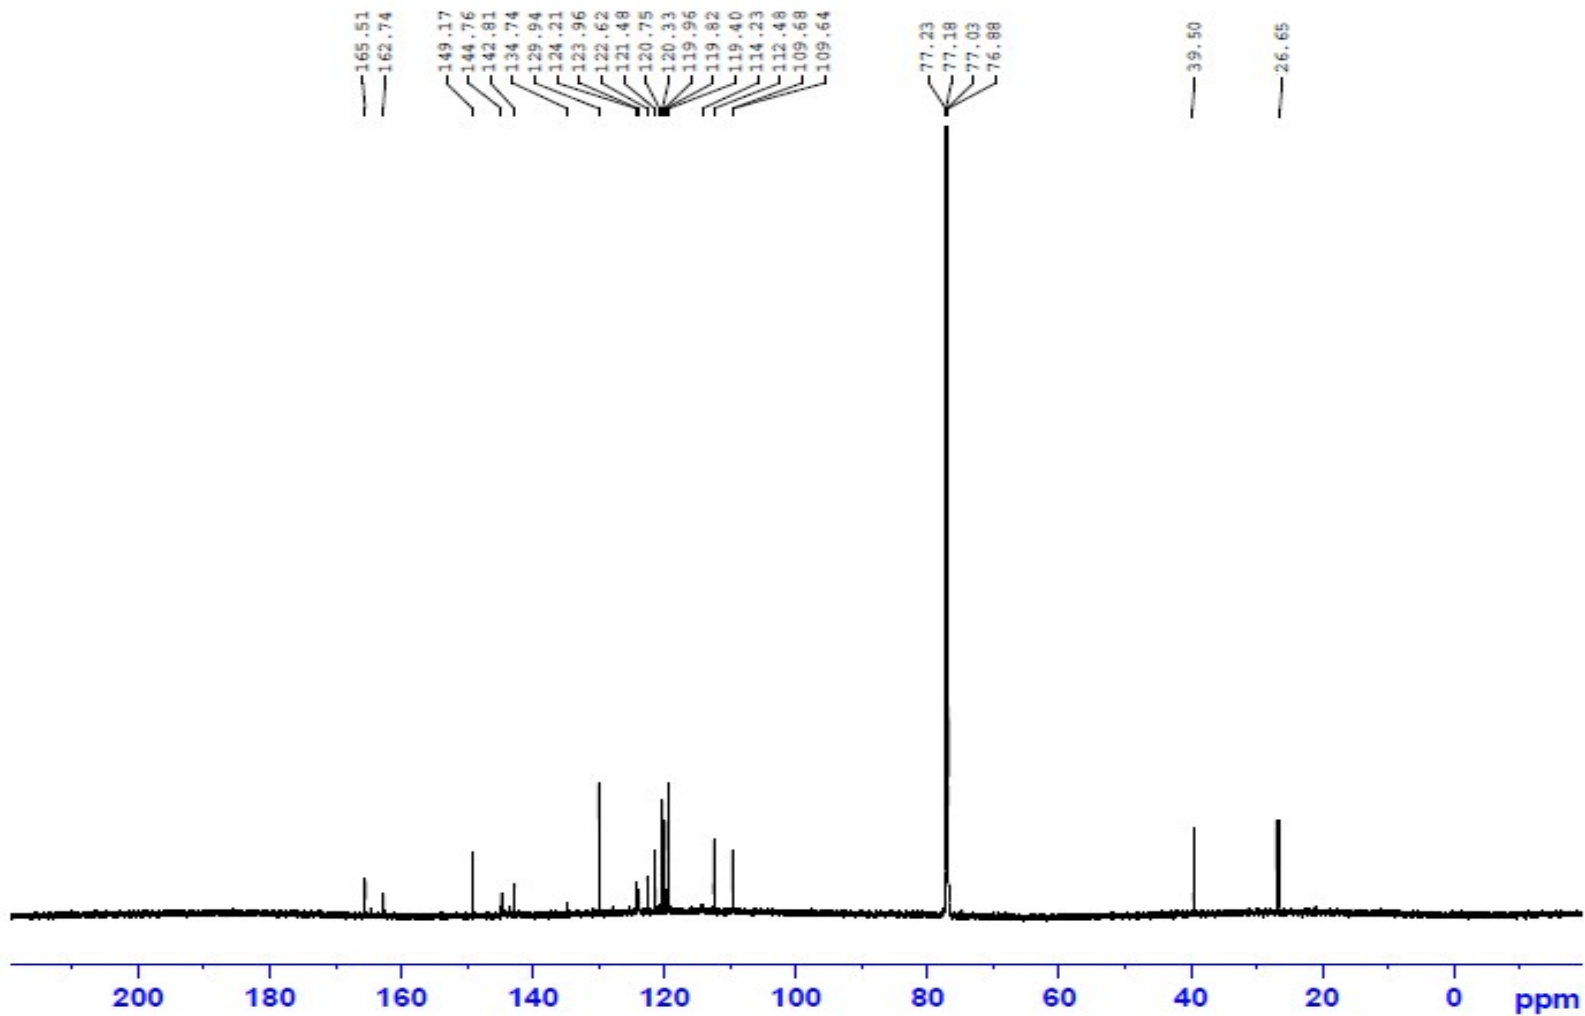

# <sup>13</sup>C NMR of compound 11

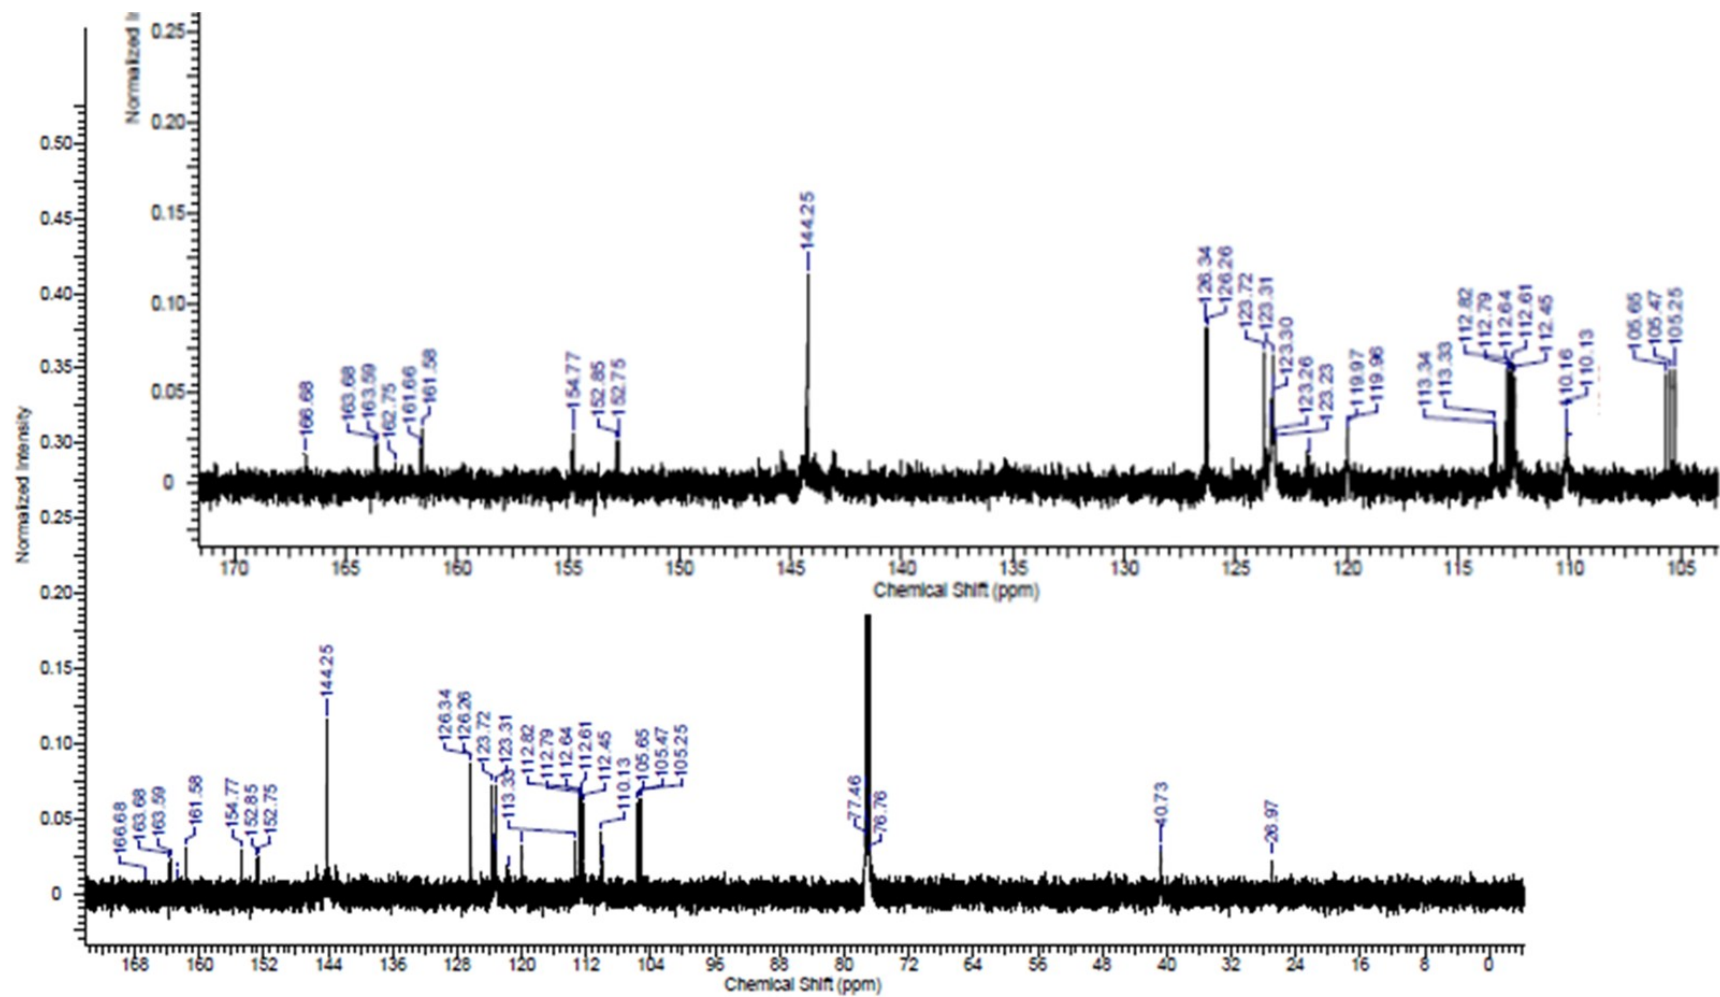

# <sup>13</sup>C NMR of compound 12

Mahboob  
Sample

CDCL<sub>3</sub>

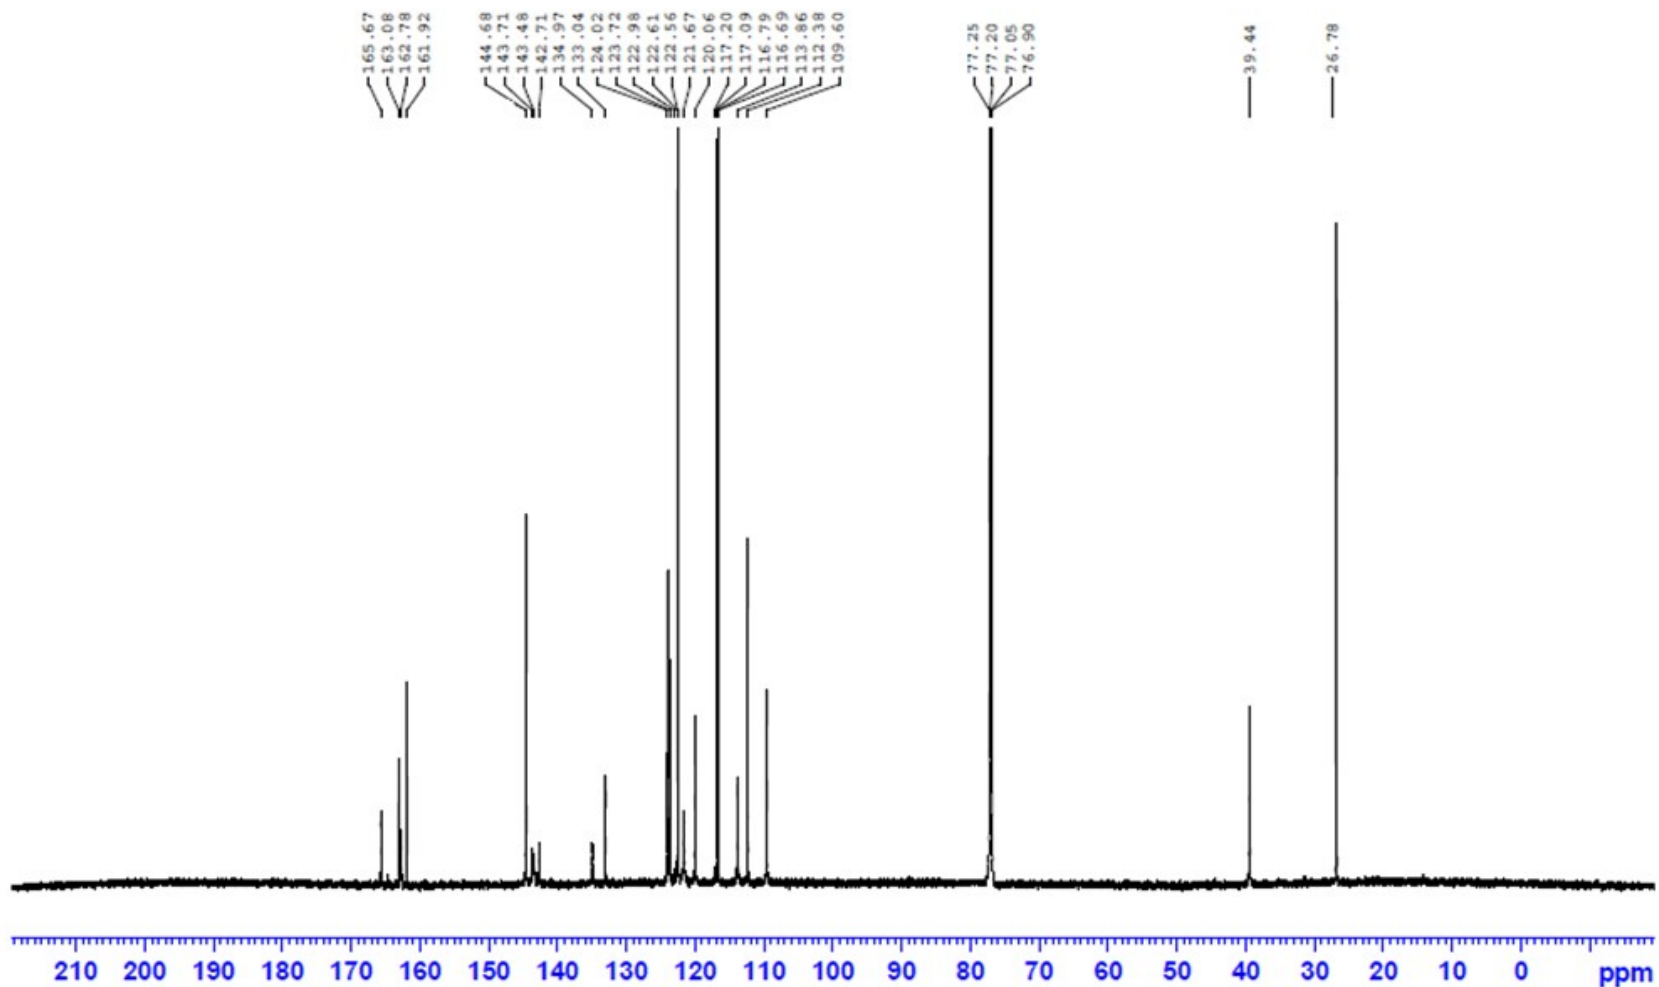

# <sup>13</sup>C NMR of compound 13

Mahboob  
Sample 21 CDCL<sub>3</sub>

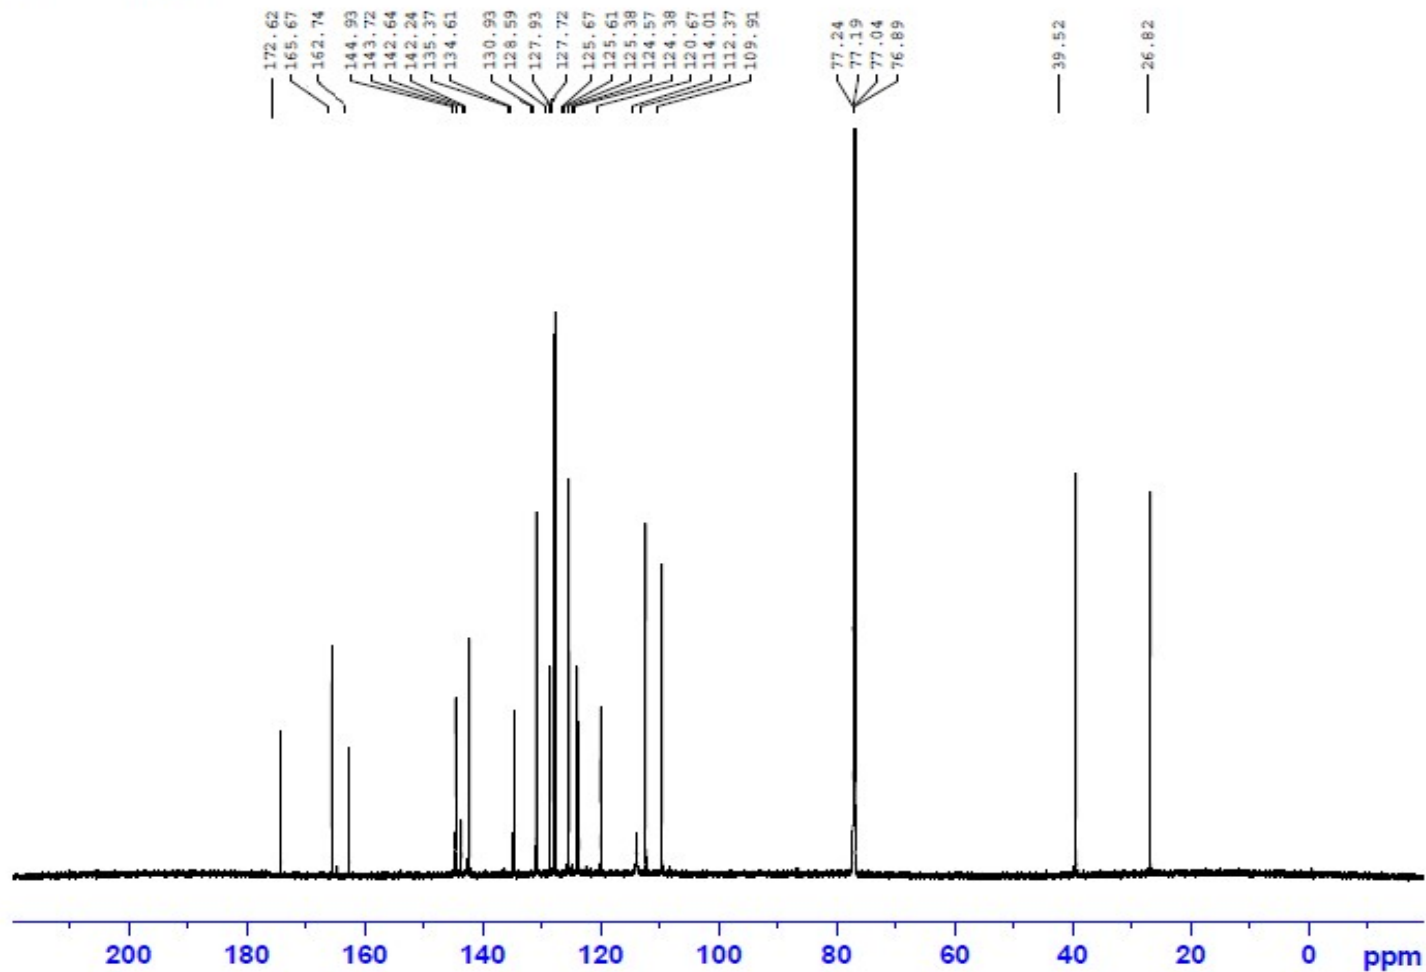

# <sup>13</sup>C NMR of compound 14

Mahboob  
Sample 25 CDCL<sub>3</sub>

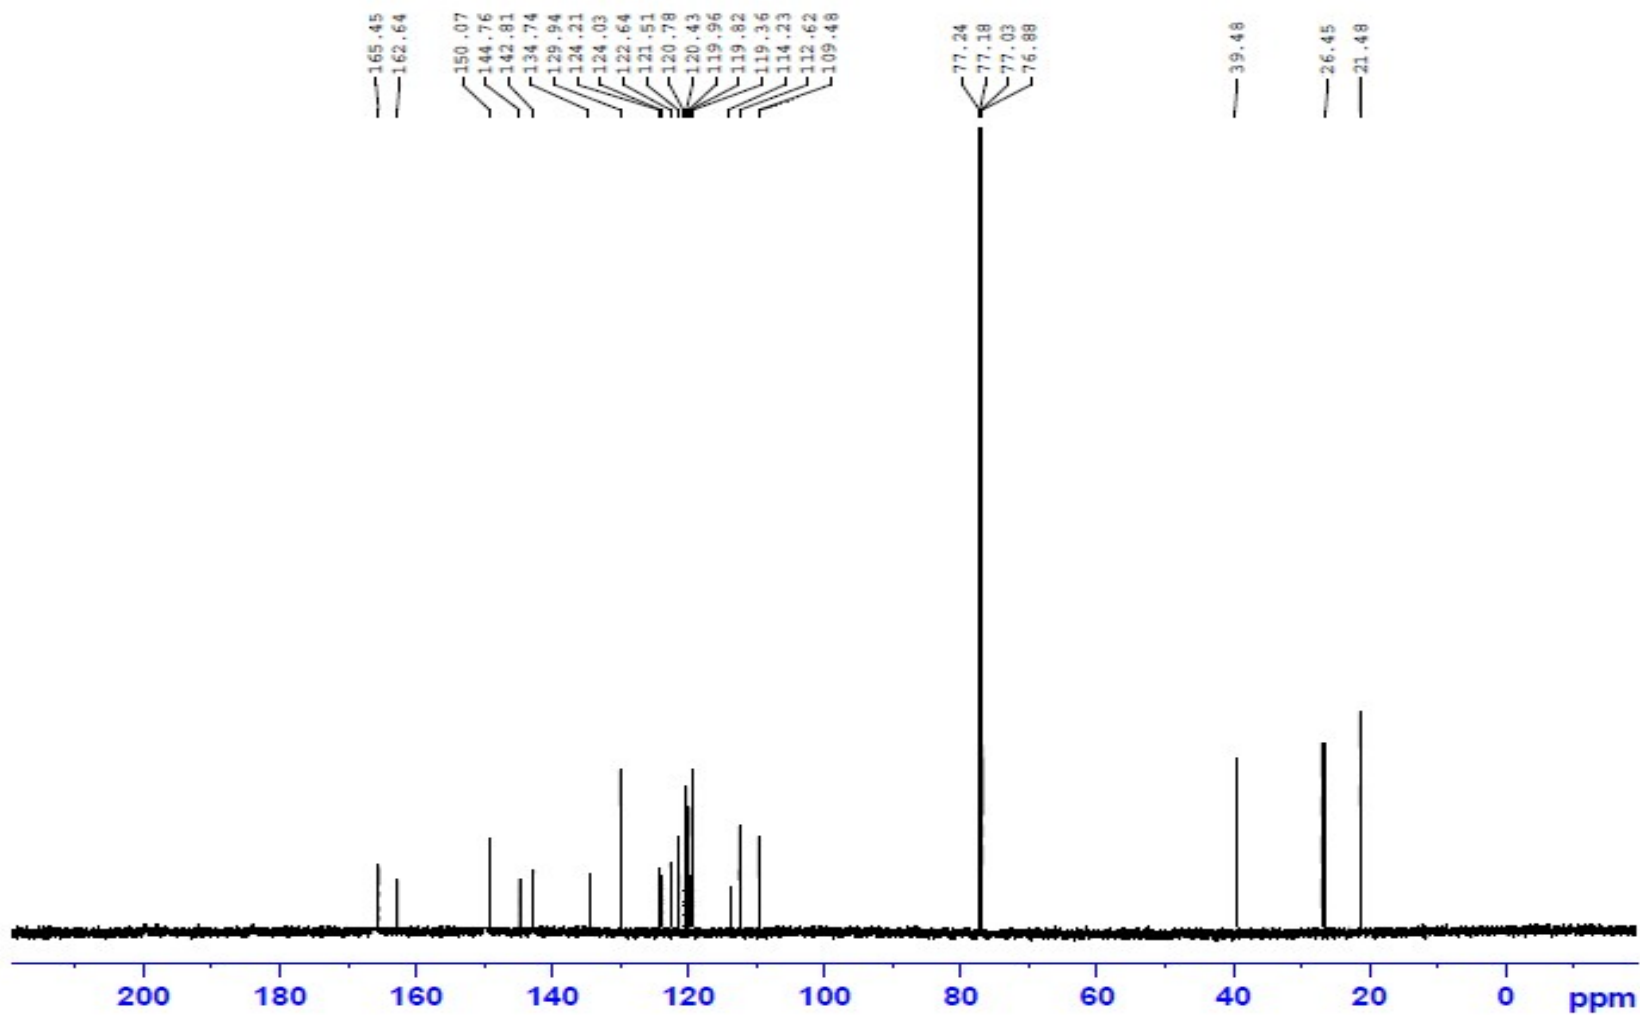

# <sup>13</sup>C NMR of compound 18

Mahboob  
Sample

DMSO

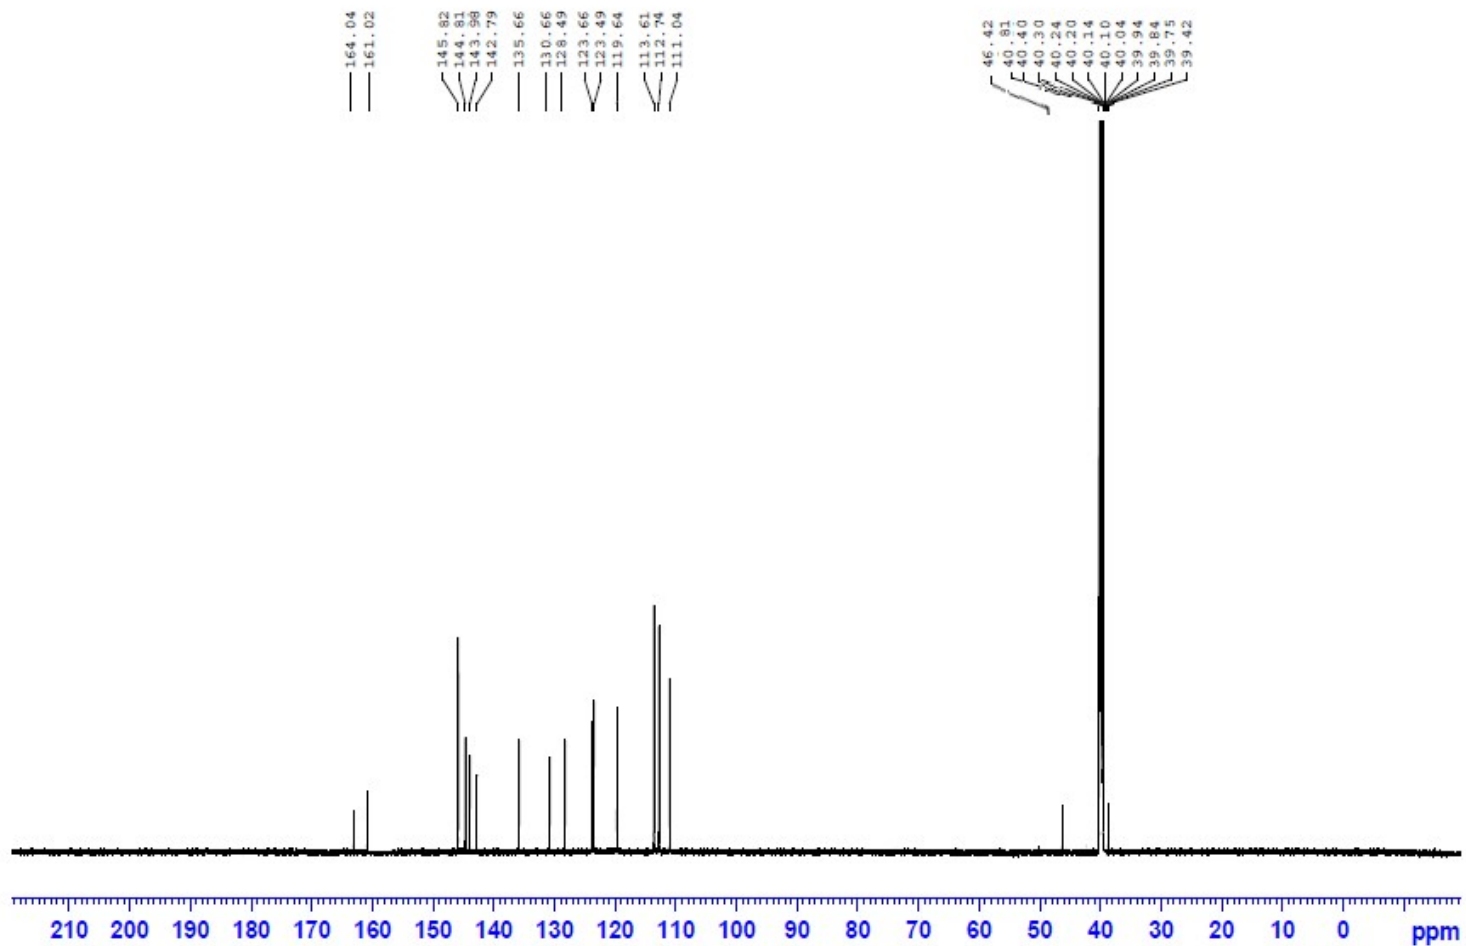



# <sup>13</sup>C NMR of compound 19

Mahboob  
Sample 15 CDCL<sub>3</sub>

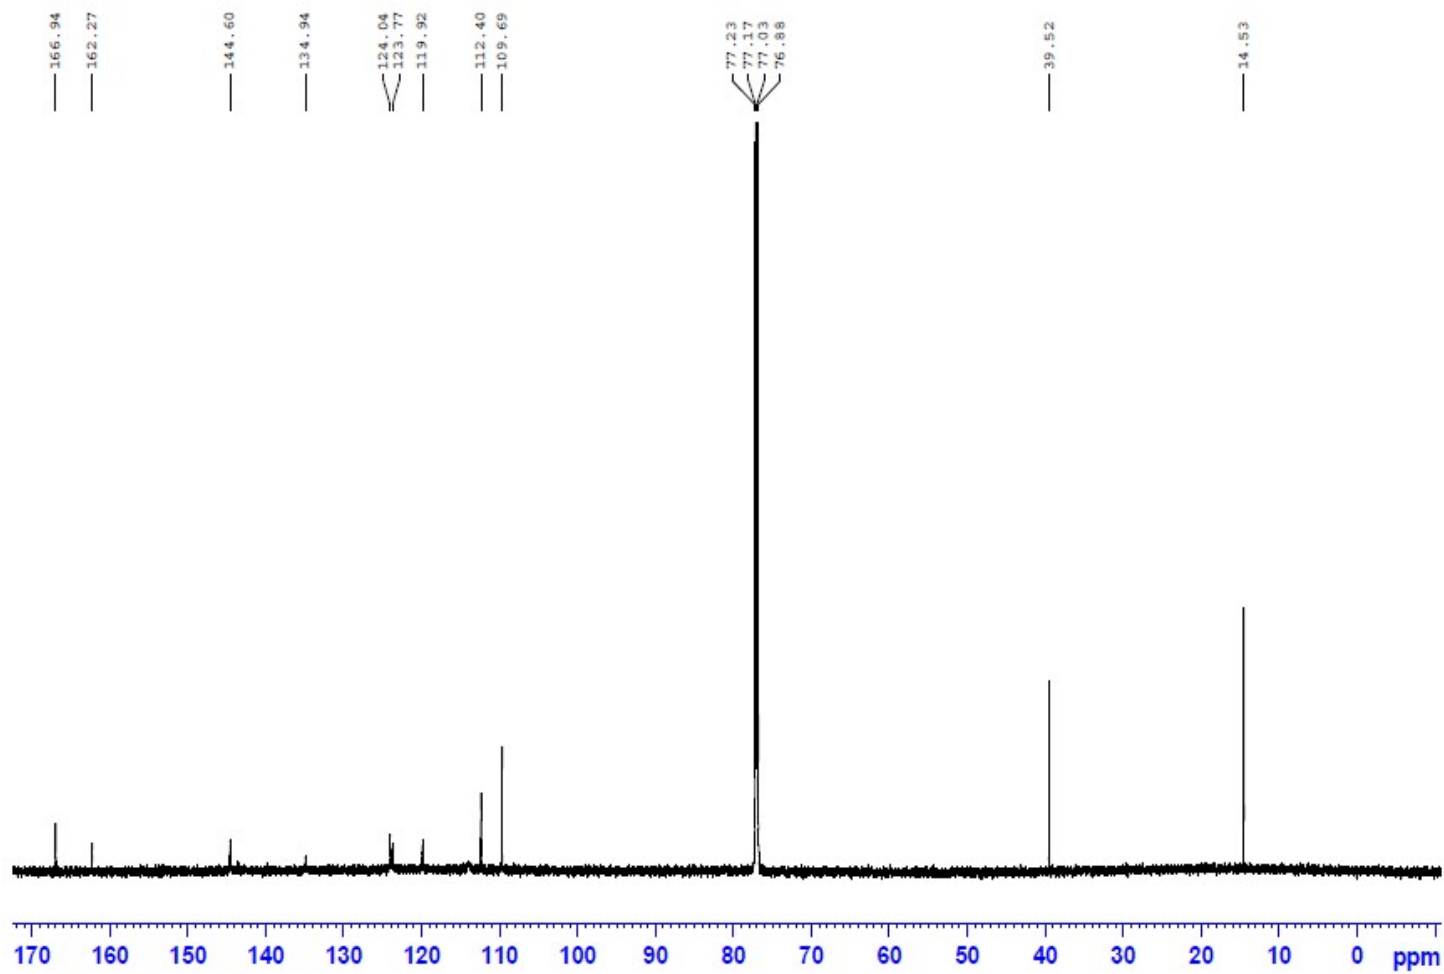

# <sup>13</sup>C NMR of compound 20

Mahboob  
Sample 16 DMSO

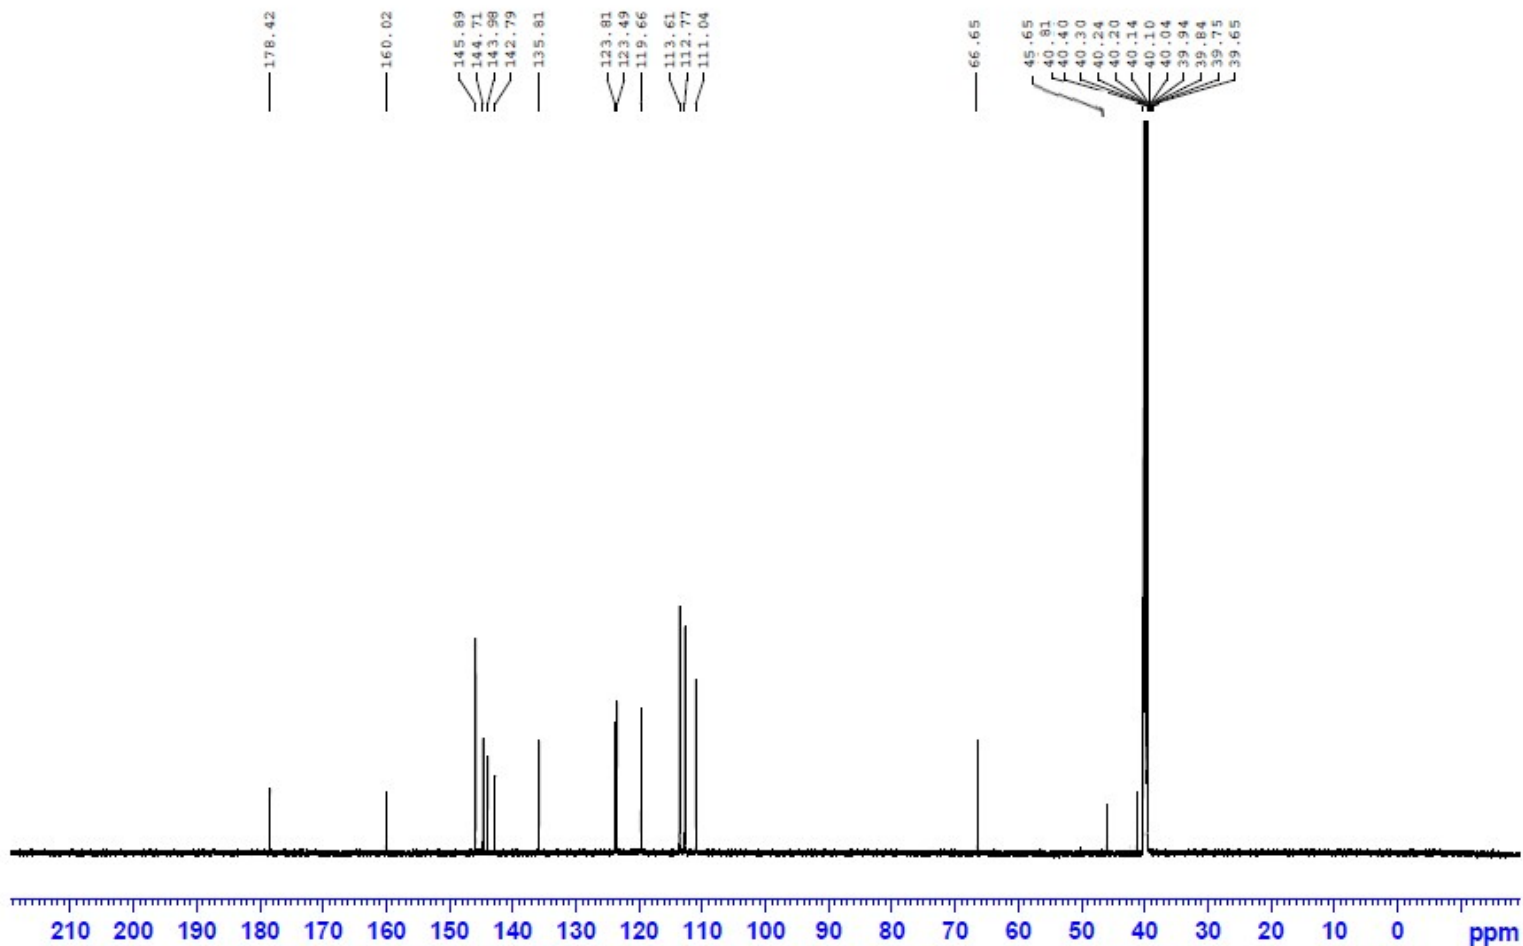

## Mass of compound 7

Dr Mohammad Mahboob\_210405132615  
LCF10605

4/5/2021 2:35:09 PM

BIOXT- 3-Cl 489

Dr Mohammad Mahboob\_210405132615 #1 RT: 0.00 AV: 1 NL: 1.46E2  
T: ITMS + p ESI Full ms [150.00-600.00]

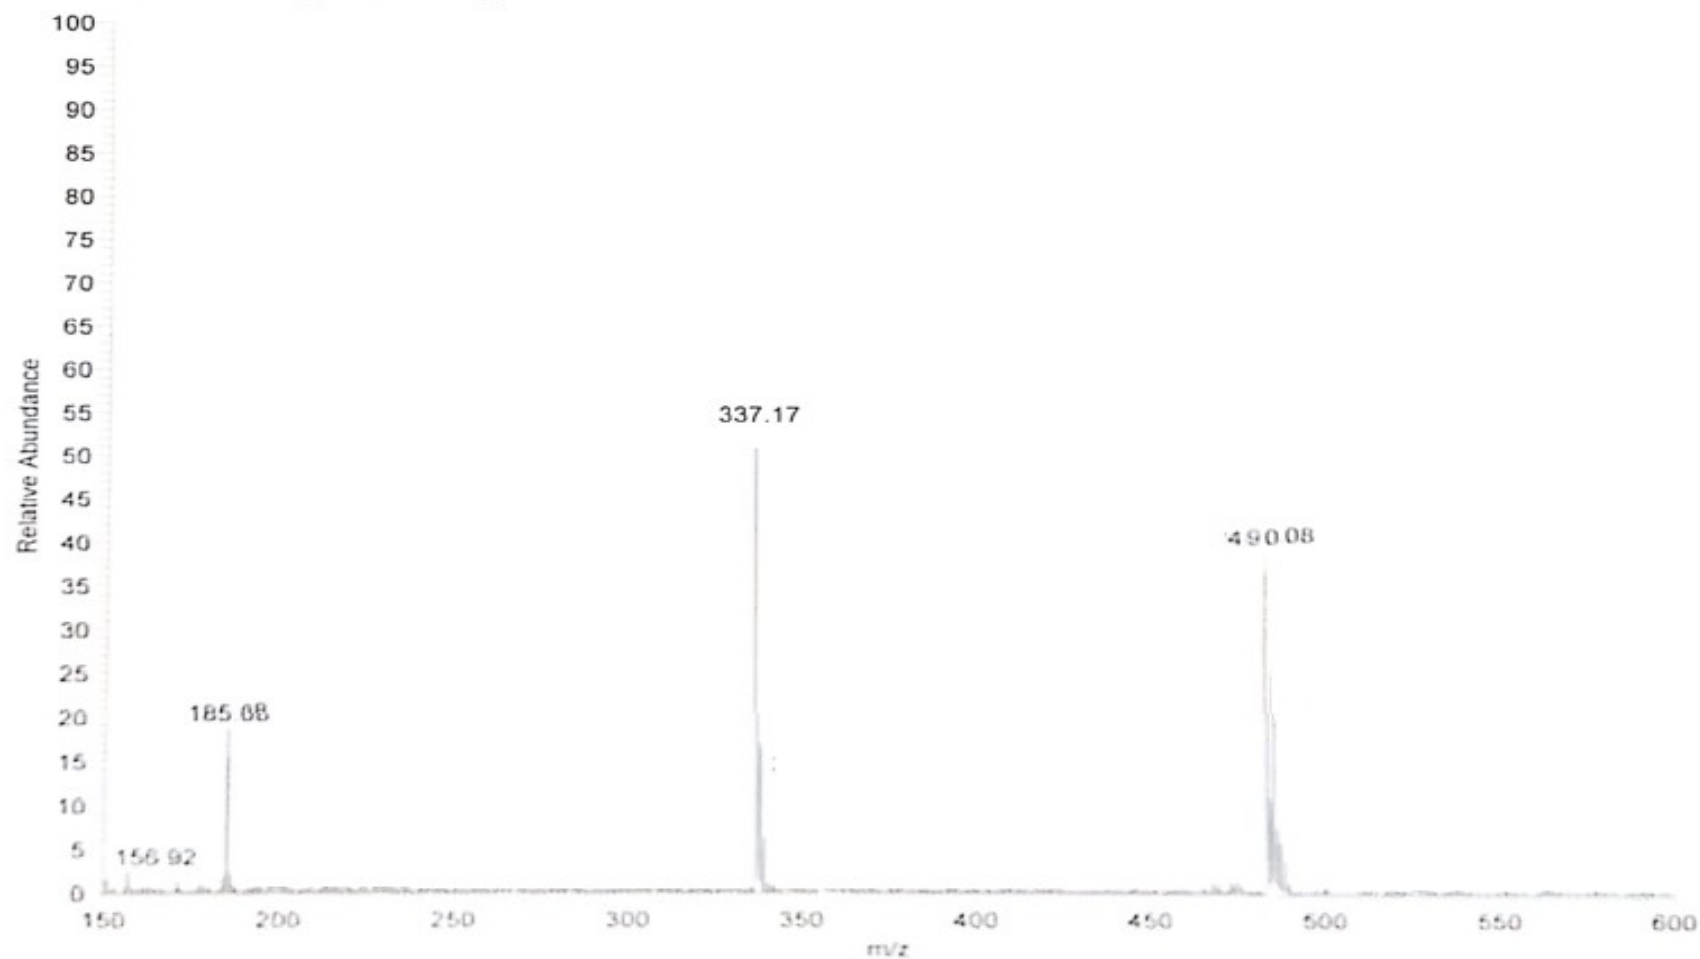

## Mass of compound 8

C:\Thermo\...Dr Mahboob\_210324143726  
LCF10605

3/31/2021 2:29:17 PM

BIOXt-2.2-di-Cl

Dr Mahboob\_210324143726 #1 RT: 0.00 AV: 1 NL: 1.92E2

T: ITMS + p ESI Full ms [150.00-600.00]

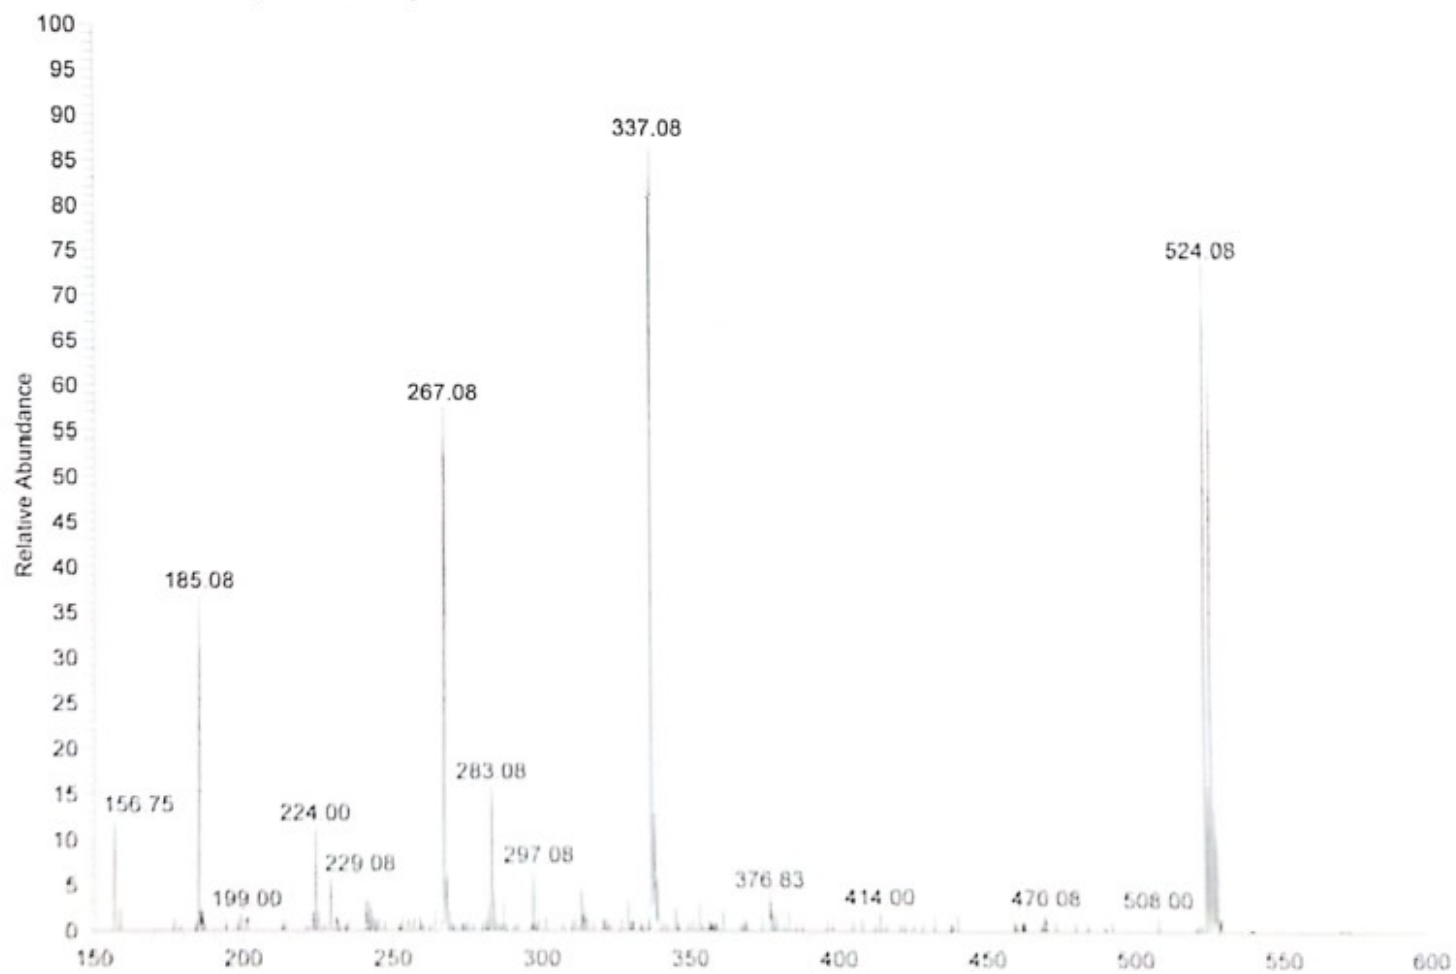

## Mass of compound 9

C:\Thermo\...Dr Mahboob\_210501164917  
LCF10605

5/1/2021 5:05:59 PM

BIOXT-M-3-Br 533

Dr Mahboob\_210501164917 #1 RT: 0.00 AV: 1 NL: 1.17E3  
T: ITMS + p ESI Full ms [150.00-600.00]

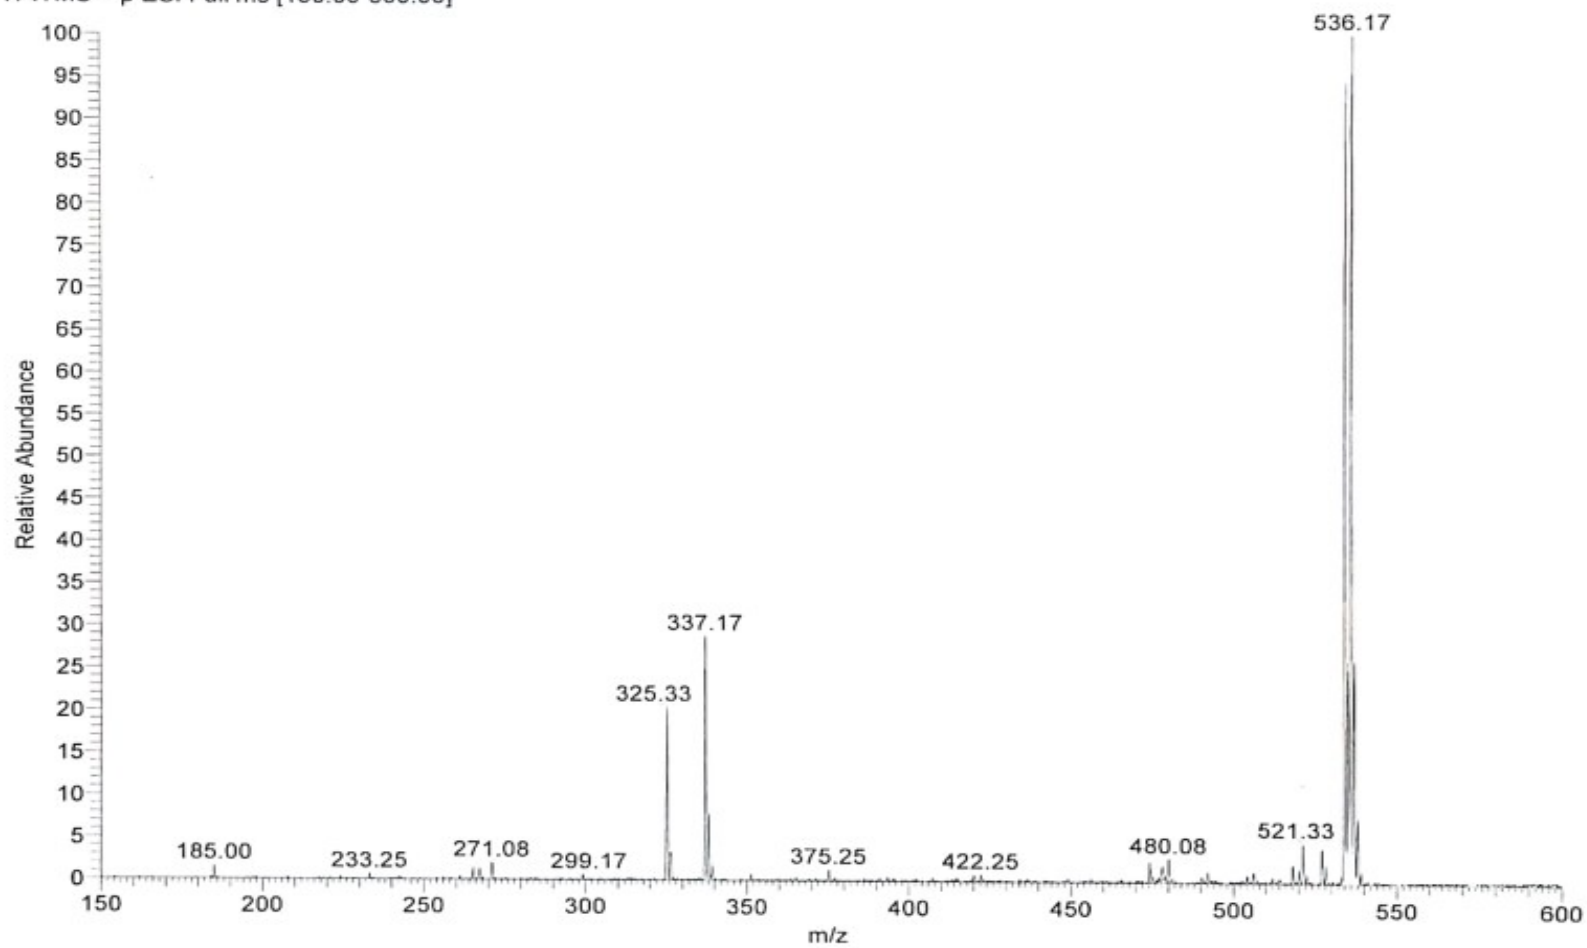

## Mass of compound 10

C:\ThermoL... \Dr Mahboob\_210331143765  
LCF10605

3/31/2021 5:37:25 PM

BIOXt-2OH

Dr Mahboob\_210331143725 #1 RT: 0.00 AV: 1 NL: 1.96E3  
T: ITMS + p ESI Full ms [150.00-600.00]

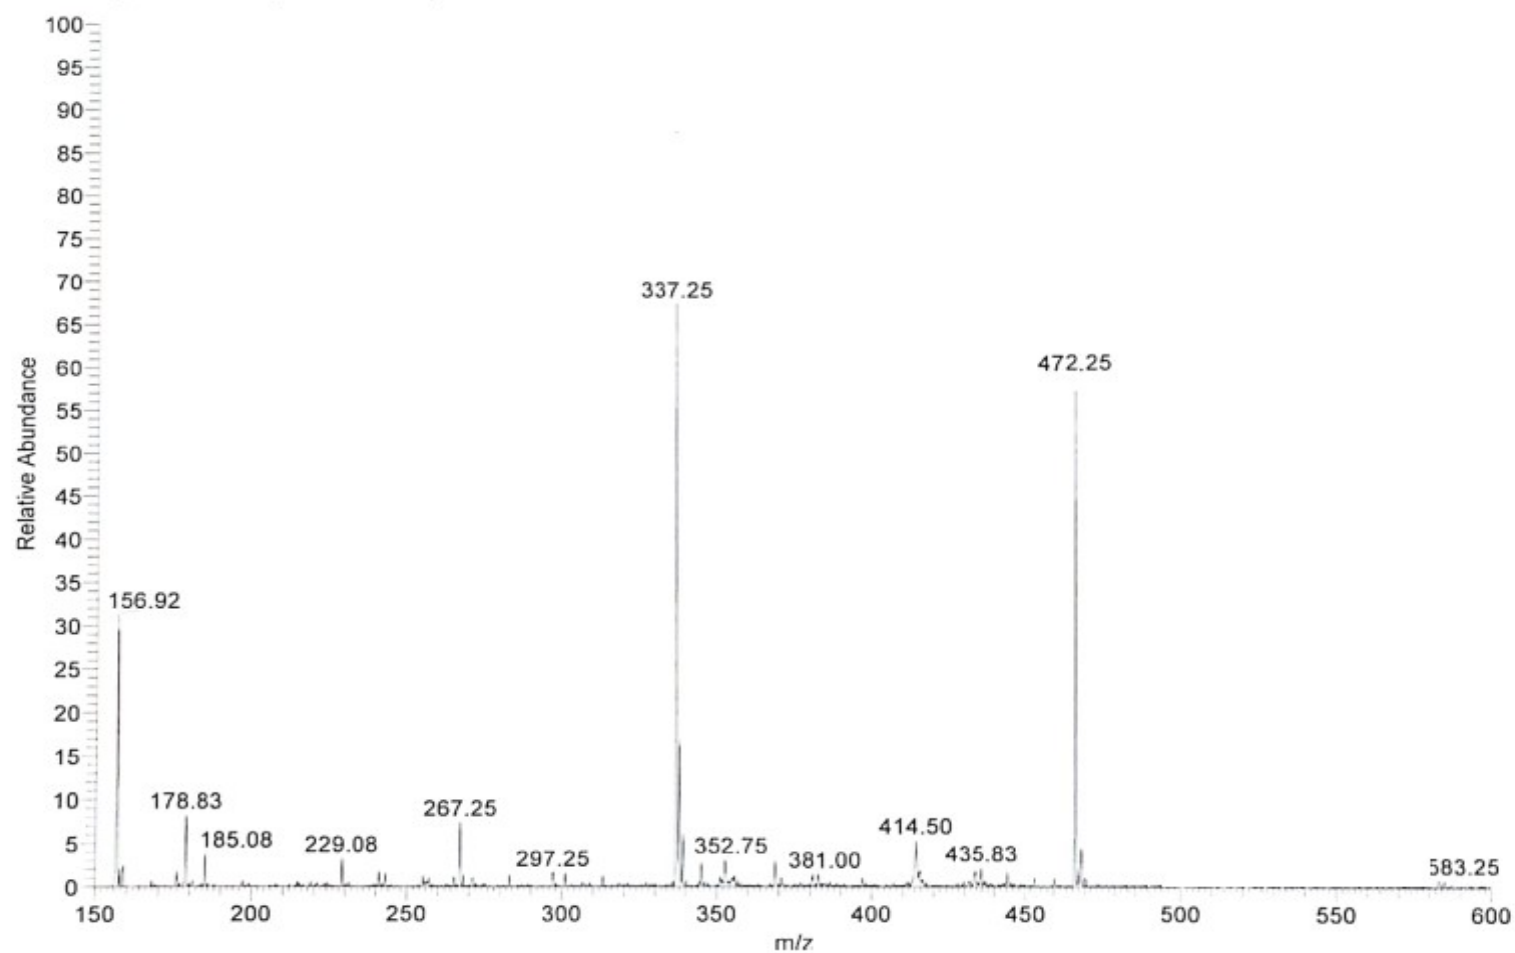

## Mass of compound 11

C:\ThermoL...Dr Mahboob\_210331143737  
LCF10605

3/31/2021 3:37:31 PM

Dr Mahboob\_210331143737 #1 RT: 0.00 AV: 1 NL: 1.96E3  
T: ITMS + p ESI Full ms [150.00-600.00]

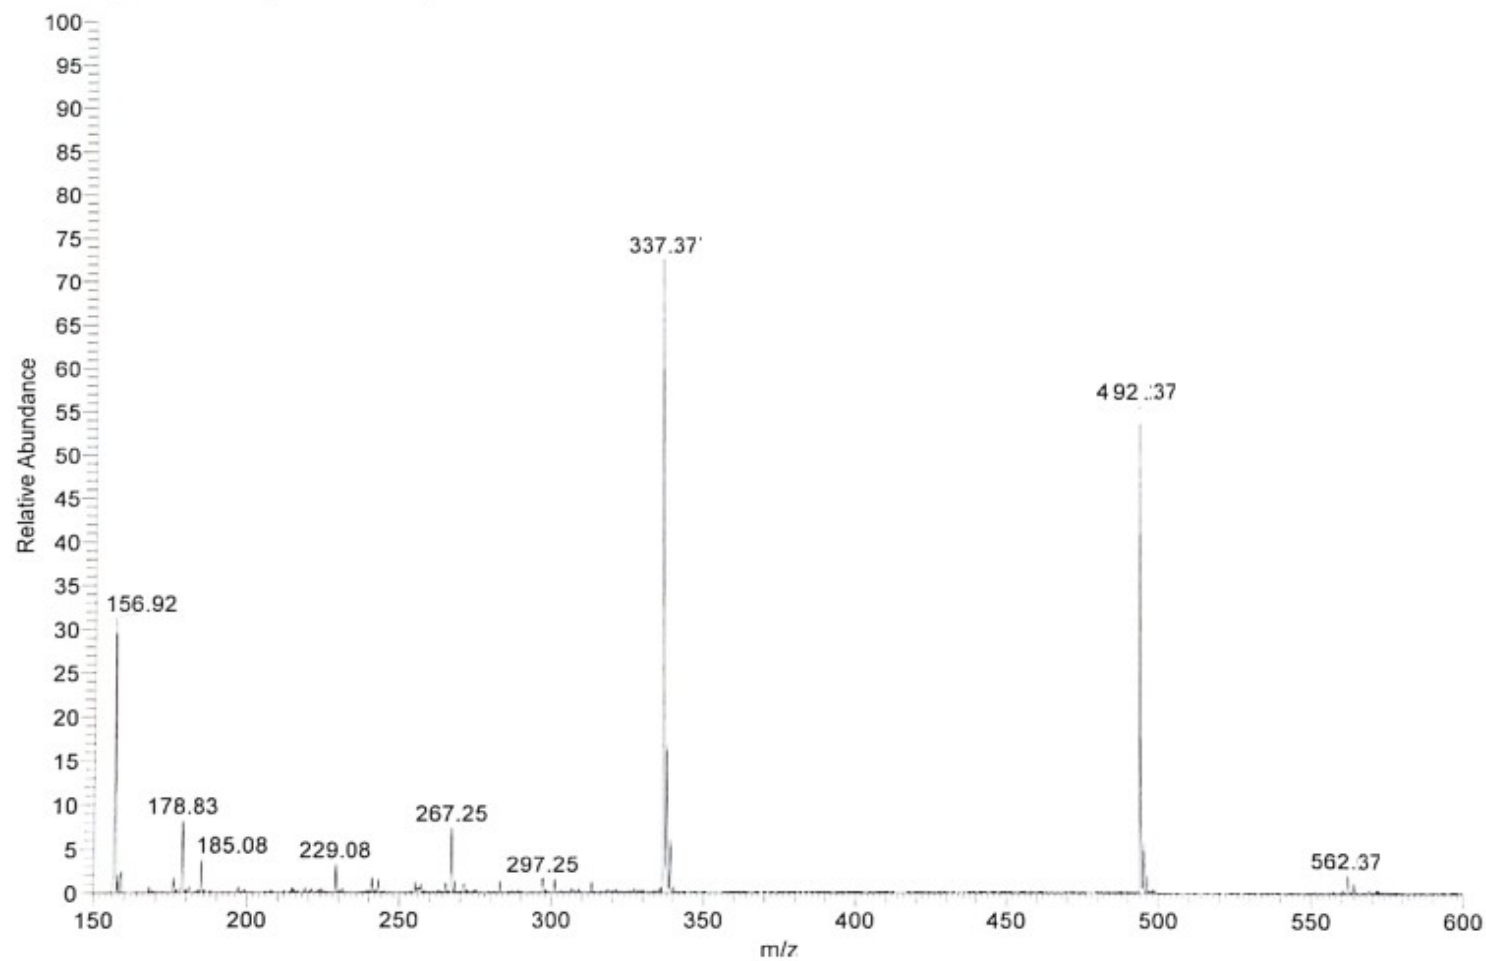

## Mass of compound 12

C:\Thermo\...Dr Mahboob\_21032414372\37.  
LCF10605

3/31/2021 4:26:17 PM

Dr Mahboob\_2103241437\37.#1 RT: 0.00 AV: 1 NL: 1.92E2  
T: ITMS + p ESI Full ms [150.00-600.00]

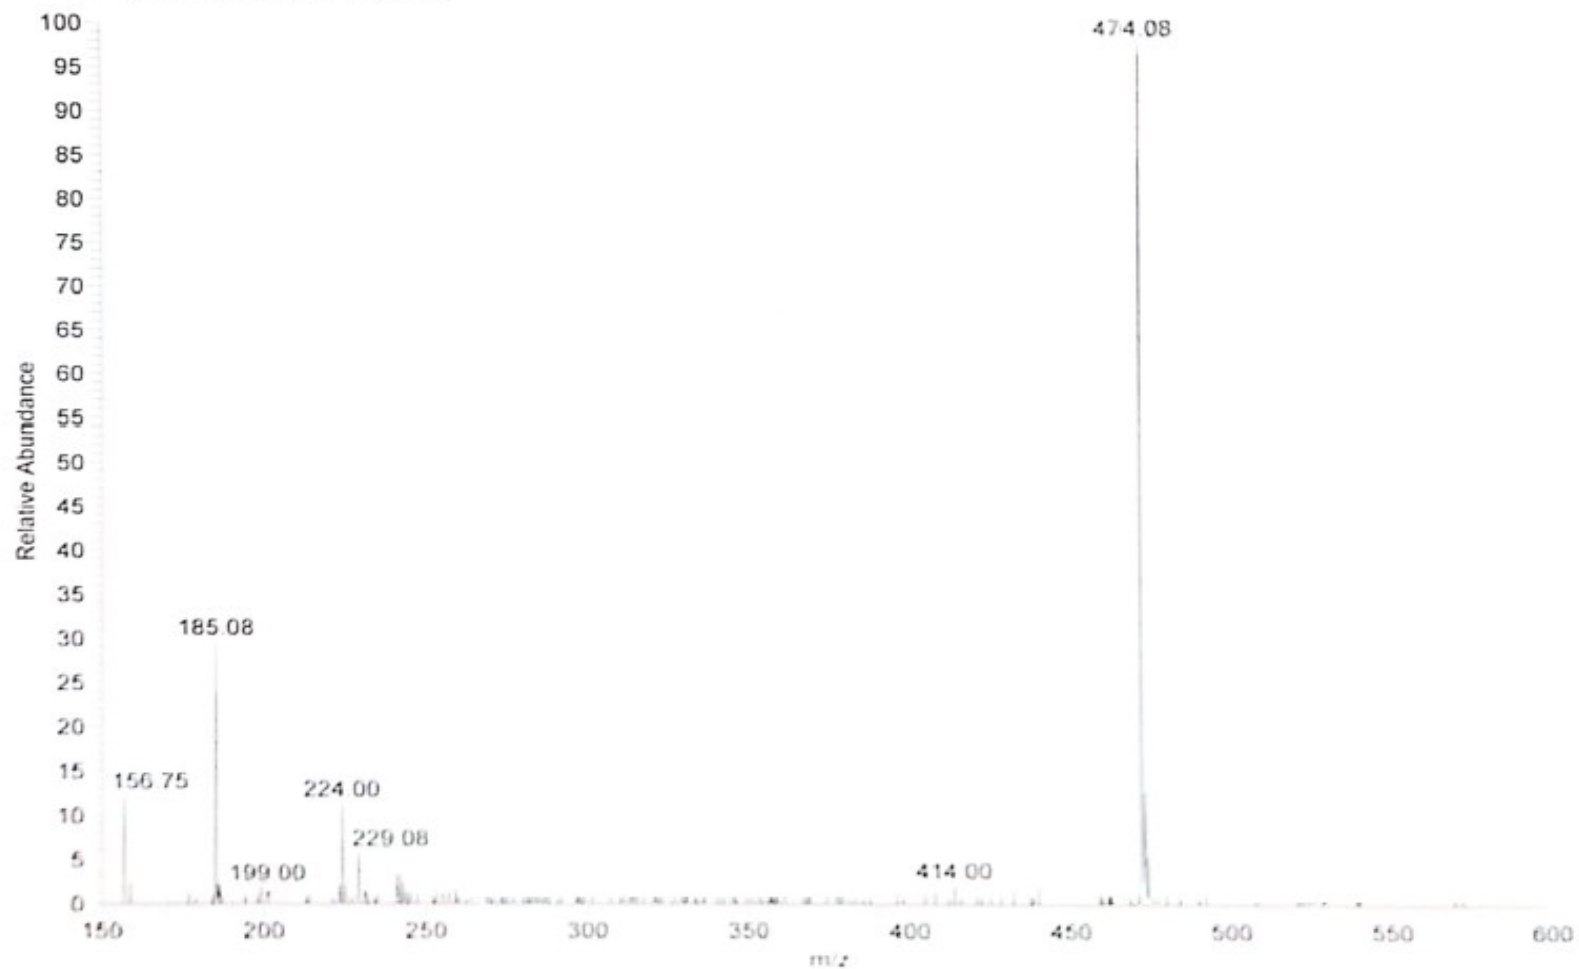



## Mass of compound 13

C:\ThermoL...Dr Mahboob\_210331143725  
LCF10605

3/31/2021 2:37:26 PM

BIOXI-3COOH 599

Dr Mahboob\_210331143725 #1 RT: 0.00 AV: 1 NL: 1.96E3

T: ITMS + p ESI Full ms [150.00-600.00]

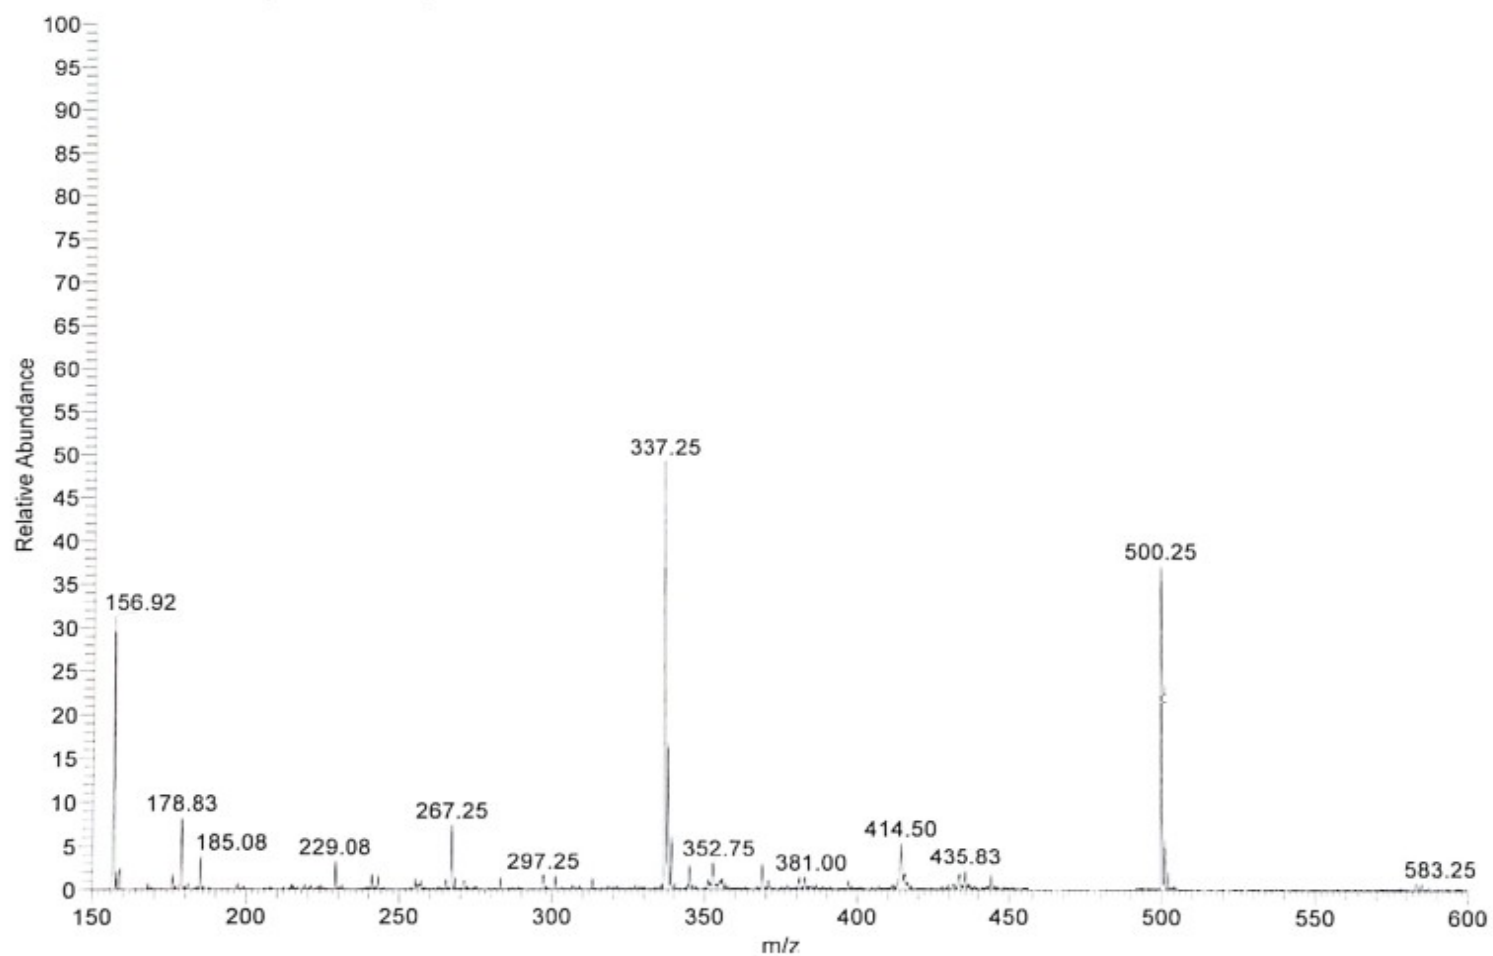

## Mass of compound 14

C:\ThermoL... \Dr Mahboob\_210331143733  
LCF10605

3/31/2021 5:37:25 PM

BIOXt-2 Me

Dr Mahboob\_210331143733 #1 RT: 0.00 AV: 1 NL: 1.96E3  
T: ITMS + p ESI Full ms [150.00-600.00]

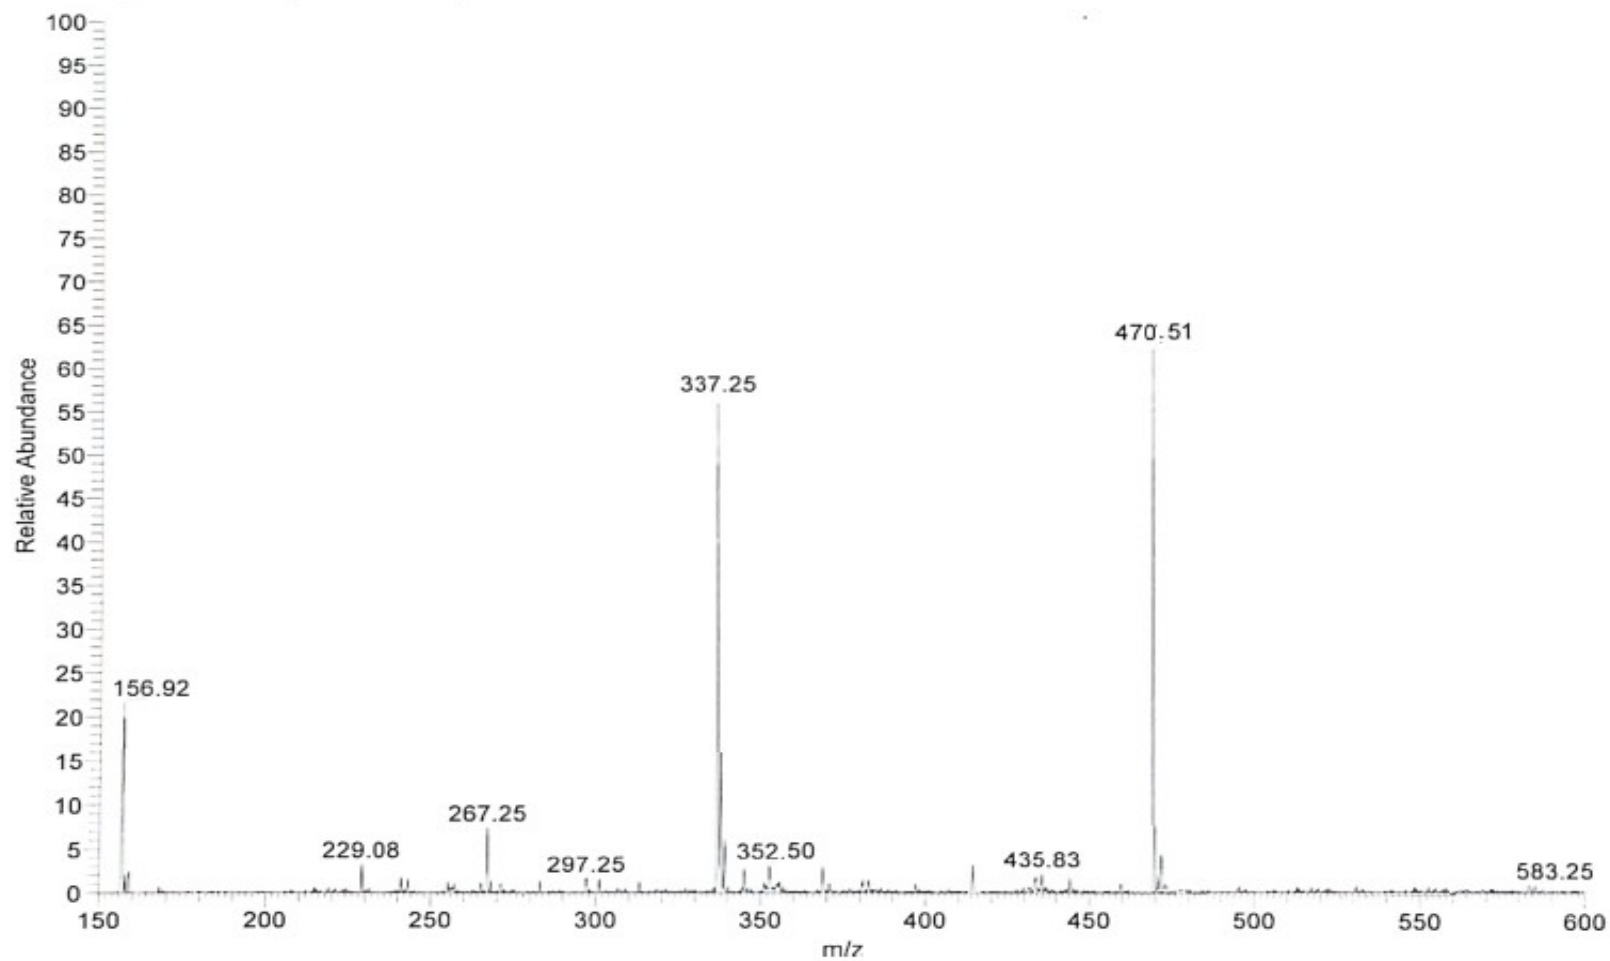

## Mass of compound 15

C:\Thermo\...Dr Mahboob\_210331143143  
LCF10605

05/21/2022 5:27:33 PM

BIOX1-3 Me

Dr Mahboob\_210331143143 #1 RT: 0.00 AV: 1 NL: 1.96E3

T: ITMS + p ESI Full ms [150.00-600.00]

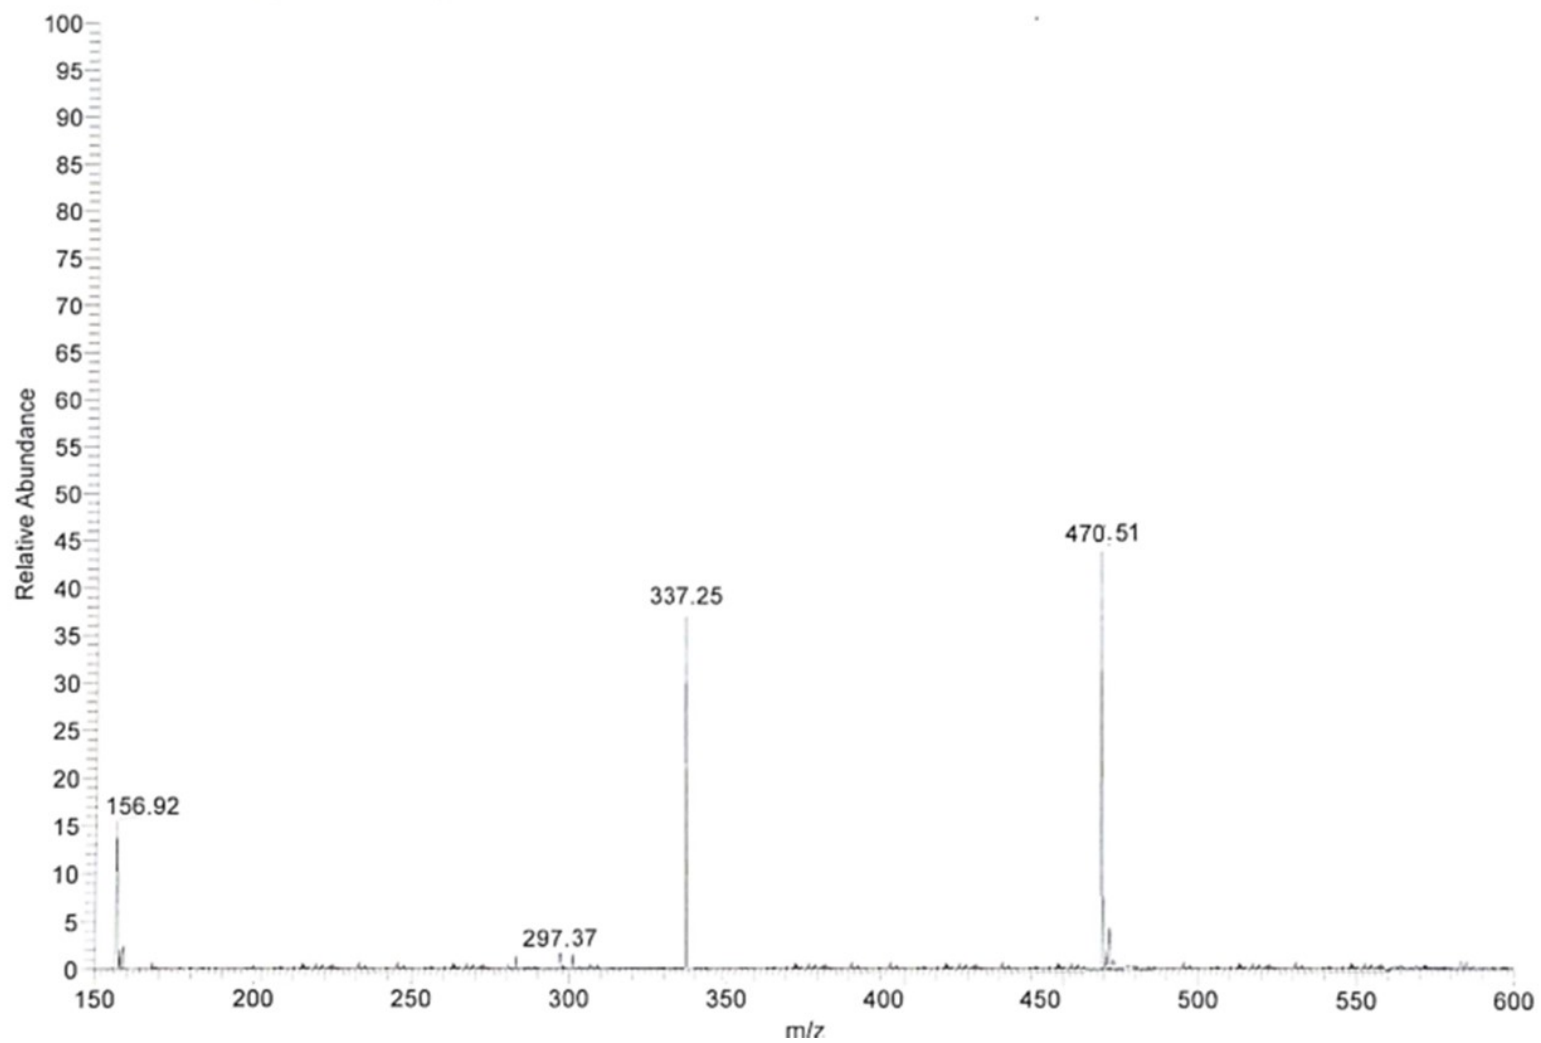

## Mass of compound 16

C:\Thermo\...Dr Mahboob\_210331143767  
LCF10605

5/21/2022 6:37:22 PM

BIOXI-3OH

Dr Mahboob\_210331143767 #1 RT: 0.00 AV: 1 NL: 1.96E3  
T: ITMS + p ESI Full ms [150.00-600.00]

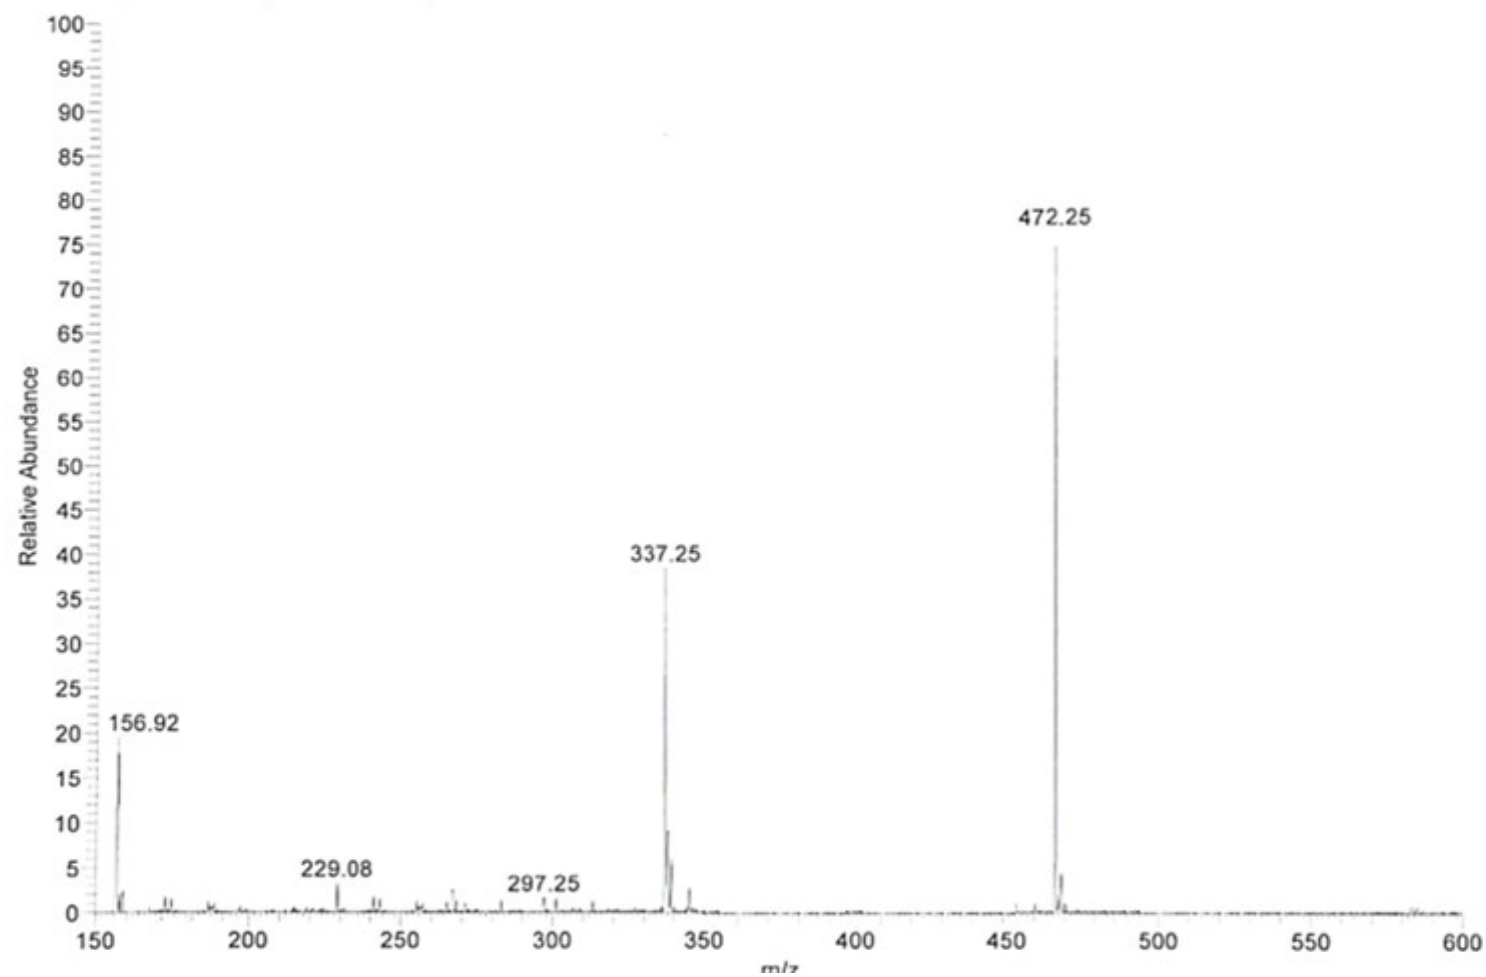

## Mass of compound 17

C:\Thermo\...Dr Mahboob\_210331143767

5/21/2022 6:33:26 PM

BIOXI-4OH

LCF10605

Dr Mahboob\_210331143767 #1 RT: 0.00 AV: 1 NL: 1.96E3

T: ITMS + p ESI Full ms [150.00-600.00]

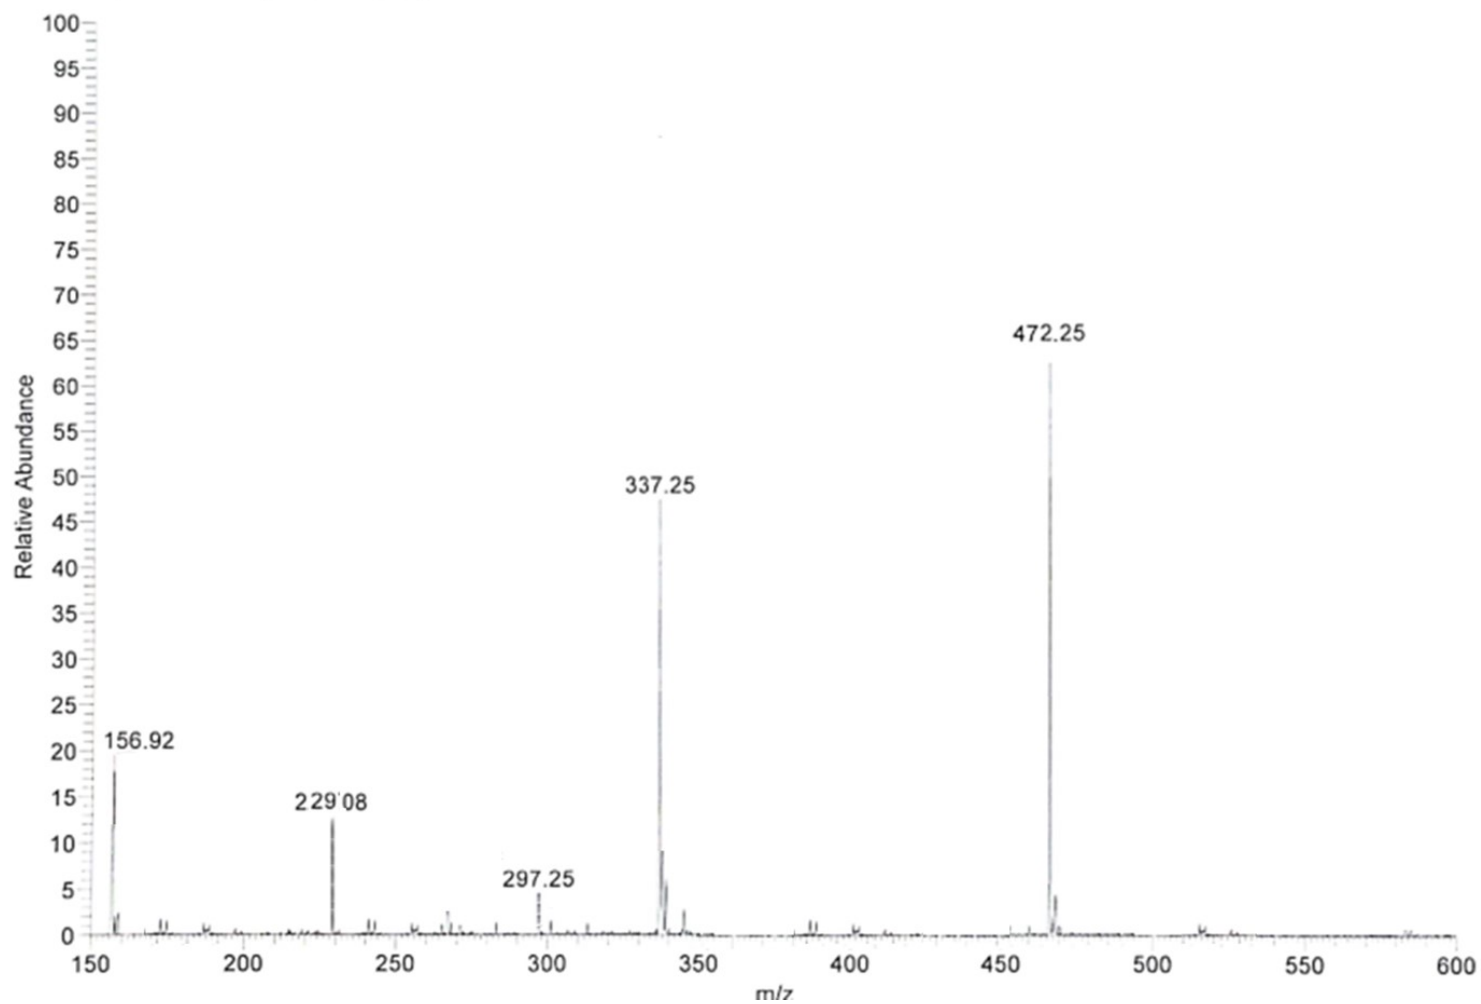

# Mass of compound 18

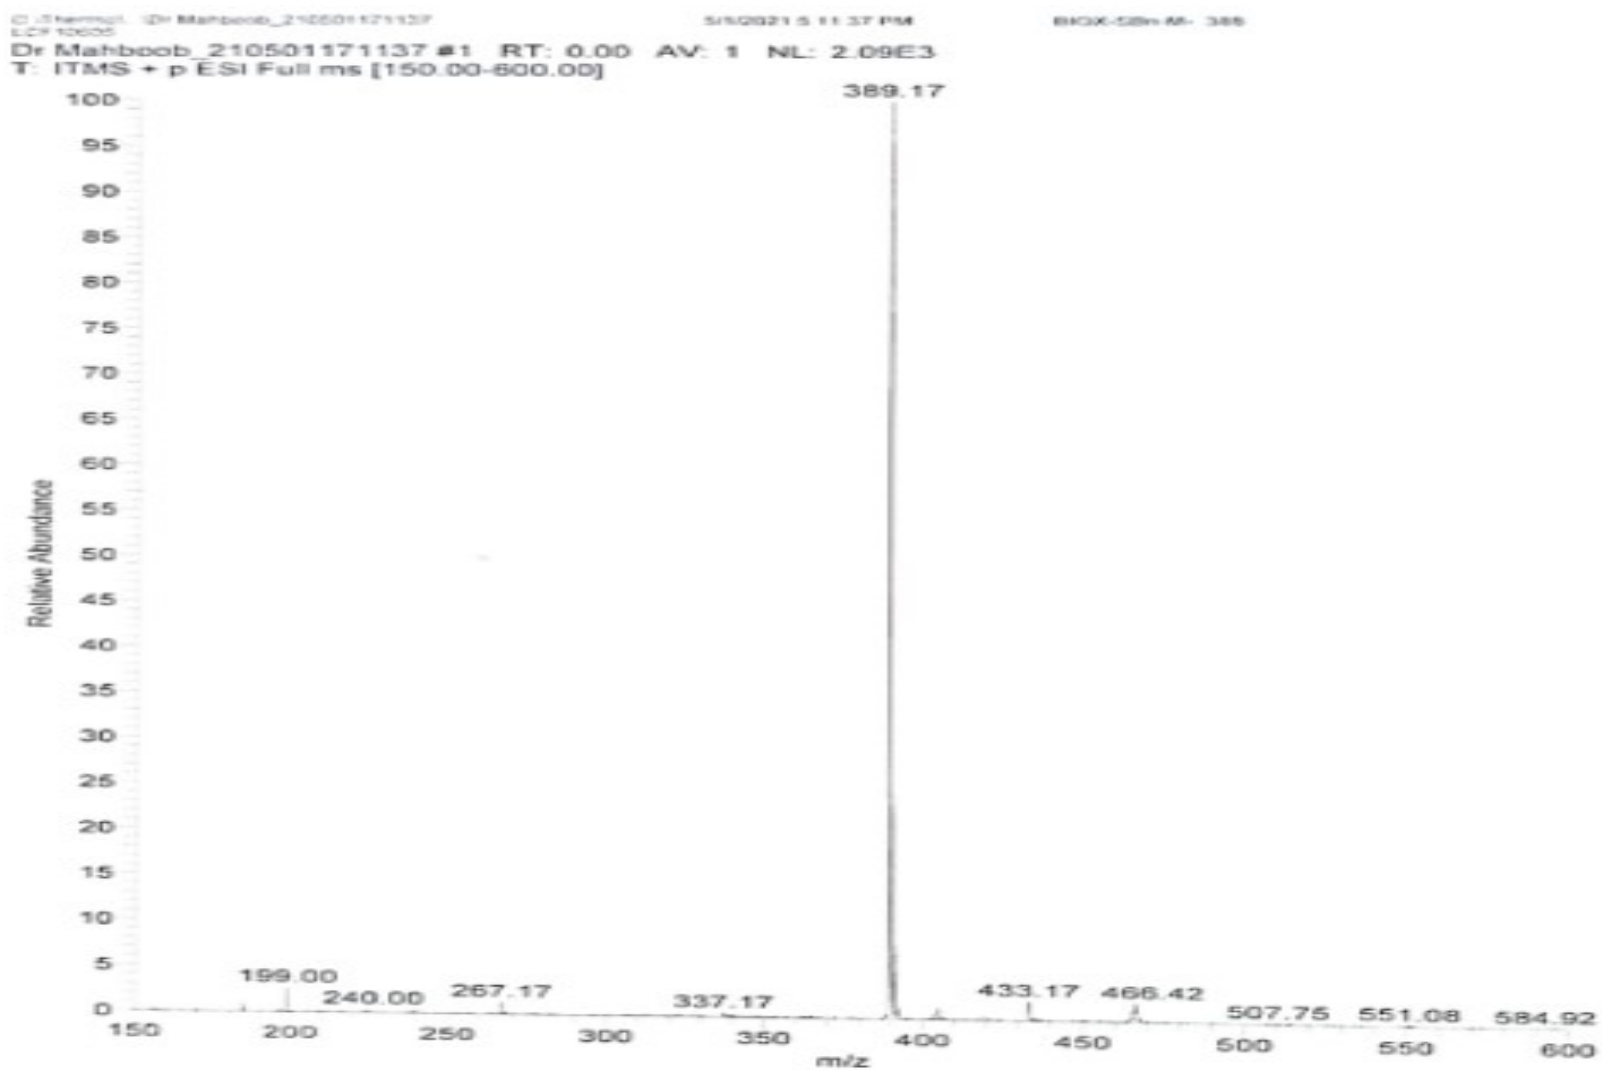

# Mass of compound 19

C:\ThermoL...Dr Mahboob\_210501172054  
LCF10605

5/1/2021 5:20:55 PM

BIOX-S-M-313

Dr Mahboob\_210501172054 #1 RT: 0.00 AV: 1 NL: 2.39E4  
T: ITMS + p ESI Full ms [150.00-600.00]

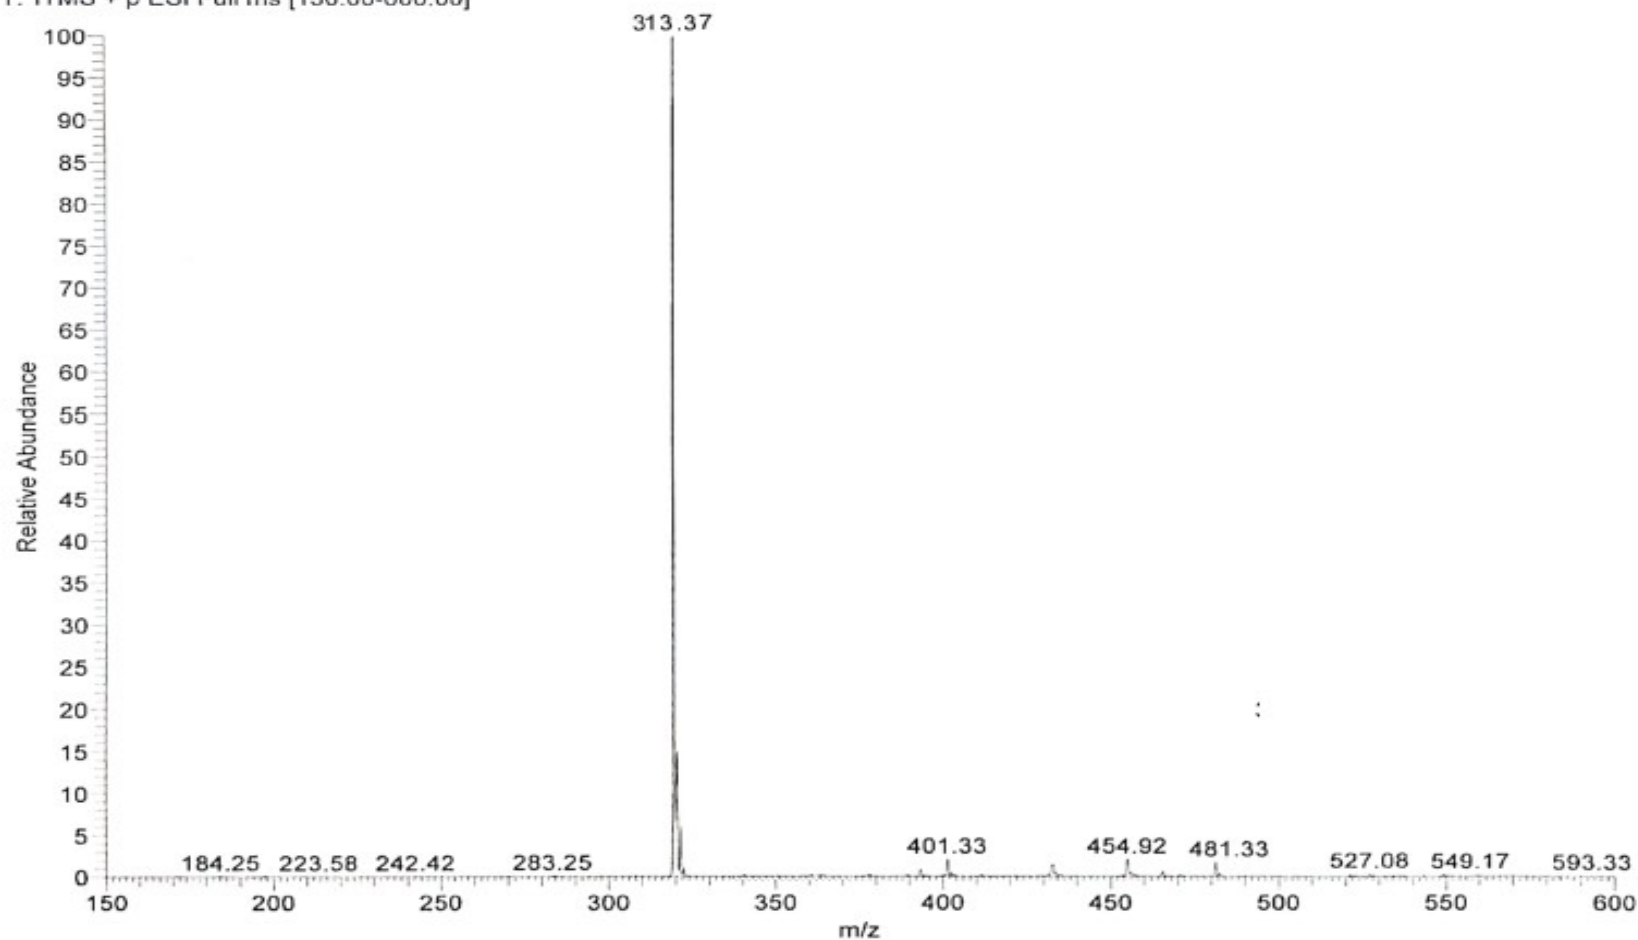

## Mass of compound 20

C:\Thermo\...Dr Mahboob\_210501173145  
LCF10605

5/1/2021 5:31:45 PM

BIOX-SB-Morpholine

Dr Mahboob\_210501173145 #1 RT: 0.00 AV: 1 NL: 1.96E3

T: ITMS + p ESI Full ms [150.00-600.00]

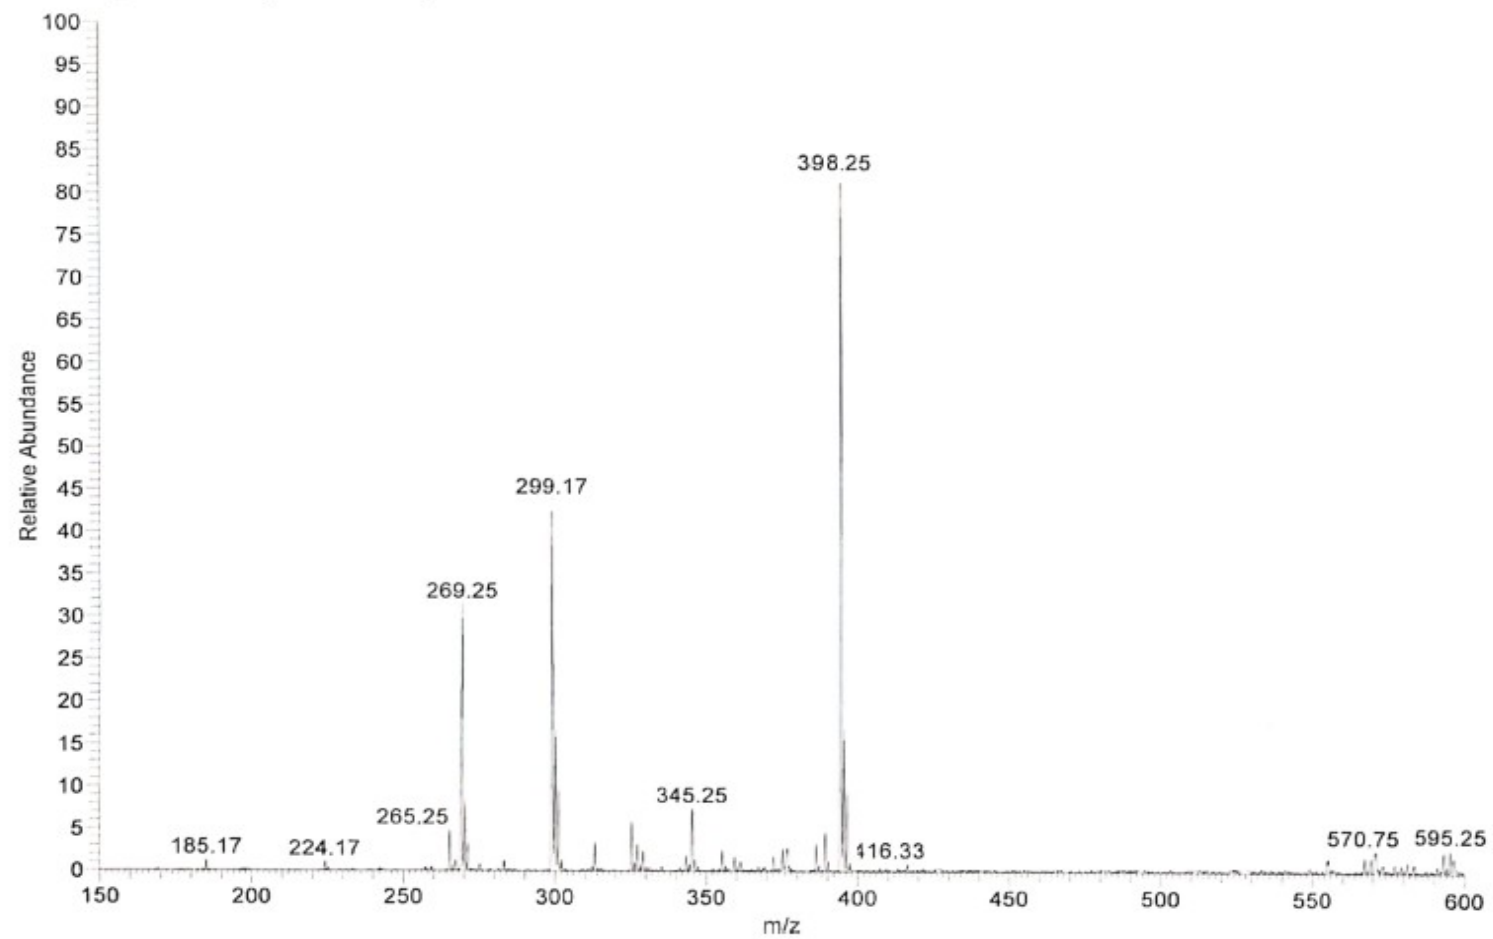

Supplement: d2nj01980a1.pdf [file d2nj01980a1.pdf]
